1 Comparative analysis of ionic strength tolerance between freshwater and marine

2 Caulobacterales adhesins

3

4 Nelson K. Chepkwony, Cécile Berne and Yves V. Brun\*

5

6 Département de microbiologie, infectiologie et immunologie, Université de Montréal, C.P. 6128,

7 succ. Centre-ville, Montréal (Québec) H3C 3J7, Canada.

8

9 Department of Biology, Indiana University, 1001 E. 3<sup>rd</sup> St. Bloomington, Indiana 47405, USA

10

11 Running title: *H. baltica* holdfast characterization

12

13 \*Address correspondence to Yves V. Brun, [ybrun@indiana.edu](mailto:ybrun@indiana.edu).

14

15 Keywords: *Hirschia baltica*, Marine Caulobacterales, Adhesion, Bacterial adhesin, Holdfast,

16 Ionic strength

## 17 **ABSTRACT**

18 Bacterial adhesion is affected by environmental factors, such as ionic strength, pH,  
19 temperature, and shear forces, and therefore marine bacteria must have developed holdfasts  
20 with different composition and structures than their freshwater counterparts to adapt to their  
21 natural environment. The dimorphic  $\alpha$ -proteobacterium *Hirschia baltica* is a marine budding  
22 bacterium in the Caulobacterales clade. *H. baltica* uses a polar adhesin, the holdfast, located at  
23 the cell pole opposite the reproductive stalk for surface attachment and cell-cell adhesion. The  
24 holdfast adhesin has been best characterized in *Caulobacter crescentus*, a freshwater member  
25 of the Caulobacterales, and little is known about holdfast composition and properties in marine  
26 Caulobacterales. Here we use *H. baltica* as a model to characterize holdfast properties in  
27 marine Caulobacterales. We show that freshwater and marine Caulobacterales use similar  
28 genes in holdfast biogenesis and that these genes are highly conserved among the two genera.  
29 We also determine that *H. baltica* produces larger holdfast than *C. crescentus* and that those  
30 holdfasts have a different chemical composition, as they contain N-acetylglucosamine and  
31 galactose monosaccharide residues and proteins, but lack DNA. Finally, we show that *H. baltica*  
32 holdfasts tolerate higher ionic strength than those of *C. crescentus*. We conclude that marine  
33 Caulobacterales holdfasts have physicochemical properties that maximize binding in high ionic  
34 strength environments.

35

## 36 **IMPORTANCE**

37 Most bacteria spend a large amount of their lifespan attached to surfaces, forming  
38 complex multicellular communities called biofilms. Bacteria can colonize virtually any surface,  
39 therefore they have adapted to bind efficiently in very different environments. In this study, we  
40 compare the adhesive holdfasts produced by the freshwater bacterium *C. crescentus* and a  
41 relative, the marine bacterium *H. baltica*. We show that *H. baltica* holdfasts have a different

42 morphology and chemical composition, and tolerate high ionic strength. Our results show that *H.*  
43 *baltica* holdfast is an excellent model to study the effect of ionic strength on adhesion and  
44 providing insights on the physicochemical properties required for adhesion in the marine  
45 environment.

46

## 47 INTRODUCTION

48 In their natural environments, bacteria preferentially form surface-associated  
49 communities, known as biofilms (1). To irreversibly adhere to surfaces and form these complex  
50 multi-cellular communities, bacteria produce strong adhesins, mainly composed of proteins or  
51 polysaccharides (2, 3). Bacterial adhesion is affected by different environmental conditions such  
52 as pH, temperature, shear forces, and ionic strength (2, 4-6). In marine environments, bacteria  
53 face 500 times higher ionic strength than in freshwater (7), therefore, marine bacteria have  
54 evolved ways to overcome the effect of ionic strength and bind permanently to surfaces in high  
55 salt environments such as seas and oceans.

56 Caulobacterales are Alphaproteobacteria found in various habitats, from oligotrophic  
57 aquatic and nutrient-rich soil environments (8, 9). The aquatic Caulobacterales species live in a  
58 wide range of environments with different salinity levels, such as pristine fresh river and lake  
59 waters, brackish ponds, and marine waters, making them a good model for studying bacterial  
60 adhesion in different ionic environments. Caulobacterales species use a polar adhesin structure  
61 called the holdfast to adhere permanently to surfaces and form biofilms (8, 10, 11). The holdfast  
62 has been primarily studied in *Caulobacter crescentus*, a freshwater member of the  
63 Caulobacterales (2, 3, 12). The *C. crescentus* holdfast uses both electrostatic and hydrophobic  
64 interactions to attach to different surfaces (6). The binding affinity of the *C. crescentus* holdfast  
65 is dramatically impaired in the presence of NaCl (6), yet marine Caulobacterales adhere to  
66 surfaces at considerably higher ionic strength, suggesting that their holdfasts have different

67 properties. However, little is known about holdfasts from marine Caulobacterales and the  
68 molecular mechanism used to adhere successfully to surfaces in salinity environments is  
69 currently unknown.

70 *C. crescentus* holdfast is the strongest characterized bioadhesive, with an adhesion  
71 force of 70N / mm<sup>2</sup> (13). Despite being first identified almost 85 years ago (14), the exact  
72 composition and structure of the *C. crescentus* holdfast remains elusive. Wheat Germ Agglutinin  
73 (WGA) lectin-binding assays show that the holdfast contains N-acetylglucosamine (GlcNAc)  
74 residues (10), while other studies suggest that the holdfast is also composed of unidentified  
75 peptide and DNA residues (15). The *C. crescentus* holdfast polysaccharide is produced via a  
76 polysaccharide synthesis and export pathway similar to the group I capsular polysaccharide  
77 synthesis Wzy/Wzx- dependent pathway in *E. coli* (16, 17) (Fig. 1A). Holdfast polysaccharide  
78 synthesis is thought to be initiated in the cytoplasm by a glycosyltransferase HfsE, which  
79 transfers activated sugar phosphate from uridine diphosphate (UDP-GlcNAc) to undecaprenyl-  
80 phosphate (Und-P) lipid carrier. Additional sugar residues are then added to form a repeat unit  
81 on the lipid carrier by three glycosyltransferases HfsG, HfsJ (17) and HfsL (18). The  
82 acetyltransferase HfsK (32) and the polysaccharide deacetylase HfsH (21) modify one or more  
83 sugar residue. The lipid carrier with the repeat units is transported across the inner membrane  
84 into the periplasm by a flippase (HfsF) (17, 19). In the periplasm, the repeat units are  
85 polymerized by two polysaccharide polymerases HfsC and HfsI (17). The holdfast  
86 polysaccharide chain is then secreted through the export proteins complex, composed of HfsA,  
87 HfsB and HfsD (20-22). Once outside the cell, holdfast polysaccharides are anchored unto the  
88 cell envelop by the action of holdfast anchor (*hfa*) proteins HfaA, HfaB, HfaD and HfaE (18, 23-  
89 25).

90 *Hirschia baltica* is a marine Caulobacterale isolated from surface water taken from a  
91 boat landing in the Kiel Fjord inlet of the Baltic sea (Germany) (26). *H. baltica* has a dimorphic  
92 life-cycle similarly to *C. crescentus* (26), but reproduces by budding from the tip of the stalk (Fig.

93 1B). Newborn swarmer cells are motile by means of a polar flagellum, and differentiate into  
94 sessile stalked cells after flagellum ejection. The sessile cells produce a holdfast at the same  
95 pole as the flagellum and synthesize a stalk at the opposite pole (27). *H. baltica* have been  
96 shown to produce holdfast containing GlcNAc residues, using fluorescent WGA lectin (27, 28).  
97 The vast majority of studies on holdfast have been done using *C. crescentus*, therefore *H.*  
98 *baltica* holdfast is poorly understood.

99         As bacteria have to develop different strategies to adhere to surfaces in a given  
100 environment, we hypothesized that *H. baltica* produces holdfasts with different physicochemical  
101 properties because *H. baltica* natural habitat is high ionic strength sea water (26), while the  
102 freshwater *C. crescentus* holdfast is highly sensitive to salt (6). Here we study *H. baltica* holdfast  
103 composition and properties. Using both genetics and bioinformatics analyses, we show that  
104 freshwater and marine Caulobacterales use orthologous genes in holdfast biogenesis and these  
105 genes are highly conserved among these genera. We show that *H. baltica* produces more  
106 holdfast material than *C. crescentus* and that the holdfasts of the two genera have a different  
107 chemical composition and behave differently. In addition to GlcNAc monosaccharides, we show  
108 that *H. baltica* holdfasts also contain galactose residues, and uncharacterized peptides different  
109 than the ones found in *C. crescentus* holdfasts. Finally, we demonstrate that *H. baltica* holdfast  
110 tolerates higher ionic strength than that of *C. crescentus*.

111

## 112 RESULTS

### 113 Organization of the holdfast genes in *H. baltica*

114 The genes essential for holdfast synthesis and export in the *C. crescentus* *hfs* locus  
115 (*hfsG*, *hfsB*, *hfsA* and *hfsD*) are conserved in *H. baltica* (27, 28). To determine if the genomic  
116 organization of all the known holdfast related genes is conserved in both species, we performed  
117 reciprocal best hit analyses using the *C. crescentus* *hfs* (holdfast synthesis, modification, and  
118 export) and *hfa* (holdfast anchoring) genes (Fig. 1C). We also extended our analysis to other  
119 fully sequenced available Caulobacterales genomes for a more global overview of the  
120 organization of these genes in this clade (Fig. 1C). Table 1 gives the locus tag names of all the  
121 holdfast related genes used in this study for *C. crescentus* CB15 (29), *C. crescentus* NA1000  
122 (30), and *H. baltica* IFAM 1418<sup>T</sup> (27) type strains.

123 All the genes reported involved in holdfast synthesis in *C. crescentus* are present in the  
124 analyzed genomes, with a few rearrangements (Fig. 1C). The general organization of the *hfs*  
125 locus is conserved in all the Caulobacterales genomes analyzed, with the genes encoding  
126 proteins essential for holdfast synthesis (glycosyltransferase gene *hfsG* and export genes *hfsA*,  
127 *hfsB*, and *hfsD*) and the initiating glycosyltransferase gene *hfsE* in a similar organization as in *C.*  
128 *crescentus*. Some of the genes involved in holdfast synthesis and modification in *C. crescentus*  
129 are not part of the *hfs* gene cluster (genes encoding the polymerase HfsI (17), the  
130 glycotransferases HfsJ (31) and HfsL (18), and N-acetyltransferase HfsK (32)); these genes are  
131 also present in *H. baltica*. Interestingly, in the genomes of the marine Caulobacterales  
132 *Oceanicaulis alexandrii*, *Maricaulis maris* and *Maricaulis salignorans*, all the *hfs* genes are found  
133 in one locus except *hfsJ* (Fig. 1C). This suggests that the ancestral *hfs* locus might have  
134 contained most of the *hfs* genes. Most of the genomes analyzed had only one polysaccharide  
135 polymerase gene, *hfsC* while other have a paralogous polysaccharide polymerase gene *hfsI*  
136 (Fig. 1C) (17).

137           Once exported outside the cell by the HfsDAB complex, the holdfast is anchored to the  
138 cell envelope by the action of anchor proteins that have been identified and characterized in *C.*  
139 *crescentus* HfaA, HfaB, and HfaD (18, 23-25). The organization of the three anchor genes *hfaA*,  
140 *hfaB* and *hfaD* in the *hfa* is conserved in all the analyzed Caulobacterales genomes (Fig. 1C). In  
141 *C. crescentus* and most of the tested Caulobacterales, the recently identified holdfast anchor  
142 gene *hfaE* (18) is not part of the *hfaABD* operon, while it is present in the *hfa* locus in both *H.*  
143 *baltica* and *Oceanicaulis alexandrii* (Fig. 1C). We could not find orthologs of the *hfa* genes in the  
144 genomes of *Robiginitomaculum antarcticum* and *Hellea balneolensis*, but this may be due to the  
145 incomplete nature of the genome. Alternatively these species have a different mechanism to  
146 anchor holdfast to the surface of the cell, as is the case for several other Alphaproteobacteria  
147 (33, 34).

148

#### 149 **Role of the *hfs* and *hfa* genes in *H. baltica***

150           To determine if the genes identified in Fig. 1C are involved in holdfast production and  
151 anchoring in *H. baltica*, we created in-frame deletion mutants of the *hfa* genes encoding the  
152 anchor proteins, and the *hfs* genes shown to be essential for holdfast synthesis in *C. crescentus*  
153 (12). We first monitored the presence of holdfasts in these mutants using fluorescence  
154 microscopy with fluorescently labelled WGA lectin (10) (Fig. 2A). We also quantified biofilm  
155 formation after 12 h of incubation at room temperature on a plastic surface, using 24-well PVC  
156 plates (Fig. 2B). All mutants could be complemented *in trans* by a replicating plasmid encoding  
157 a copy of the deleted gene (Fig. 2B).

158           We first deleted the holdfast anchor genes encoding the HfaB and HfaD proteins. Both  
159 *H. baltica*  $\Delta hfaB$  and  $\Delta hfaD$  mutants produced holdfast, but they failed to anchor it to the cell  
160 body, resulting in holdfast being shed in the medium (Fig. 2A). *H. baltica*  $\Delta hfaB$  was not able to  
161 permanently attach to surfaces, and could not form a biofilm (Fig. 2B). In contrast, *H. baltica*

162 *ΔhfaD* mutants were not completely deficient for permanent adhesion, with around 20% of  
163 biofilm formed compared to WT (Fig. 2B). These results are in agreement with what was  
164 reported for *C. crescentus* *ΔhfaB* and *ΔhfaD* mutants (24), suggesting that the Hfa proteins have  
165 a similar function in both organisms.

166 We then made in-frame deletions of the genes encoding export proteins HfsA and HfsD.  
167 These genes are essential for holdfast production in *C. crescentus* (20). Deletion of these genes  
168 in *H. baltica* similarly completely abolished holdfast production (Fig. 2A) and surface attachment  
169 (Fig. 2B). These results show that deletion of the export genes is sufficient for a complete loss  
170 of holdfast production, and that a holdfast is crucial for surface attachment in *H. baltica*.

171 Finally, we made in-frame deletions of the genes encoding glycosyltransferases HfsG  
172 and HfsL, which are essential for holdfast formation in *C. crescentus* (17, 18). Similarly, *H.*  
173 *baltica* *ΔhfsG* and *ΔhfsL* mutants did not produce holdfasts nor form biofilms (Fig. 2A and 2B).

174

#### 175 **Effect of modulating *hfsL* and *hfsG* expression of *H. baltica* holdfast properties.**

176 We investigated if tunable expression of the *hfsL* and *hfsG* genes, are essential for  
177 holdfast production, could change holdfast synthesis and properties. To achieve this goal, we  
178 first engineered a replicating plasmid harboring an inducible promoter suitable for *H. baltica*. We  
179 adapted the system developed for a tightly controlled heavy metal (copper) promoter inducible  
180 system in *Hyphomonas neptunium*, a marine Caulobacterale closely related to *H. baltica* (35).  
181 Similarly, we used the promoter for copper resistant protein operon *copAB* (*Pcu*) in *H. baltica*  
182 (*copA*, *hbal\_0699*, and *copB*, *hbal\_0698*) (Fig. S1A top panel). We first showed that *H. baltica*  
183 can tolerate up to 500 μM of CuSO<sub>4</sub> without significant effect on growth (Fig. S1B-C). We then  
184 fused 500 pb upstream of the *copAB* operon (*Pcu*) to *lacZ* gene and assembled the construct  
185 onto the pMR10 replicating plasmid (Fig. S1A, bottom panel), to assess *Pcu* promoter activity  
186 using β-galactoside as a reporter. We showed that *Pcu* is a tightly controlled promoter, with a



187 working inducible range of CuSO<sub>4</sub> from 10 to 250 μM (Fig. S1D), concentrations that do not  
188 impact *H. baltica* growth (Fig S1 B-C).

189 We expressed *hfsL* or *hfsG* under control of the *Pcu* inducible promoter in *H. baltica*  
190  $\Delta hfsL$  and  $\Delta hfsG$  mutants. In both cases, when the gene expression is highly induced (250 μM  
191 CuSO<sub>4</sub>), holdfast size and adhesion are restored to WT levels (Fig. 3A-B). At lower level of  
192 induction (10 μM CuSO<sub>4</sub>), both complemented strains produced small holdfasts (Fig. 3A), but  
193 failed to form biofilms after 12 h (Fig. 3B). To test if these results were due to altered adhesive  
194 properties of these smaller holdfasts, or if their smaller size was not enabling cells to be retained  
195 on the surface, we combined the  $\Delta hfsL$  and  $\Delta hfsG$  mutations with an in-frame deletion of the  
196 holdfast anchor gene *hfaB*, resulting in mutants that produce holdfasts shed in the medium upon  
197 CuSO<sub>4</sub> induction (Fig. 3C). We grew exponential cultures of the double-mutants on glass  
198 coverslips for 4 h to allow them to attach to the surface. After incubation, the slides were rinsed  
199 with dH<sub>2</sub>O to remove all cells that are unable to anchor their holdfast to their cell body, resulting  
200 in coverslips displaying attached holdfasts and no cells (Fig. 3C). At low level of induction of  
201 *hfsL* or *hfsG*, shed holdfasts from *H. baltica*  $\Delta hfaB \Delta hfsL$  and  $\Delta hfaB \Delta hfsG$ , though smaller than  
202 those from the *H. baltica*  $\Delta hfaB$ , were still able to efficiently bind to glass slide (Fig. 3C). We  
203 quantified the number of holdfasts attached at different levels of induction of *hfsL* and *hfsG* (Fig.  
204 3D). At low induction, the mutants produced 50% the amount of holdfast compared to WT  
205 holdfasts (Fig. 3D). To visualize how cells with small holdfasts interact with glass surface, we  
206 performed time-lapse microscopy in a microfluidic device, starting with static conditions, and  
207 adding flow after 2 minutes, to allow cells to bind to the surface (Fig. 3E). We observed that at  
208 low induction of *hfsL* (10 μM CuSO<sub>4</sub>), cells efficiently bind to the surface, despite their small  
209 holdfasts. However, once flow was added to the microfluidic device, cells detached, showing  
210 that the small holdfasts are not sufficient to withstand high shear forces. At high induction of  
211 *hfsL* (250 μM CuSO<sub>4</sub>), cells produced bigger holdfasts and are able to bind to the surface  
212 permanently. This result confirms that the smaller holdfasts are still adhesive, but their size is

213 probably not sufficient to allow the cells to efficiently permanently bind to surfaces and form  
214 biofilms.

215

216 ***H. baltica* produces large holdfasts by developmental and surface contact stimulation**  
217 **pathways.**

218 It was previously shown that WGA interacts with *C. crescentus* and *H. baltica* holdfasts  
219 (27, 28). However, side-by-side microscopy imaging using fluorescent WGA suggested that *H.*  
220 *baltica* holdfasts might be larger than *C. crescentus* holdfasts (Fig. 4A). To quantify relative  
221 holdfast size, we imaged mixed cultures of *H. baltica* and *C. crescentus* simultaneously labeled  
222 with fluorescent WGA lectin. We measured the area of fluorescent WGA staining on single cells  
223 for each strain (Fig. 4A) and determined that, on average, the fluorescence area is 5 times  
224 larger for *H. baltica* holdfasts compared to those of *C. crescentus* (Fig. 4B). Since WGA binds to  
225 GlcNAc residues in the holdfast, either *H. baltica* holdfasts are larger than those of *C.*  
226 *crescentus* or *H. baltica* and *C. crescentus* holdfasts are similar in size, but *H. baltica* holdfasts  
227 contain more GlcNAc residues, yielding an increased fluorescence area from bound WGA. To  
228 reliably measure the size of holdfasts, we used Atomic Force Microscopy (AFM) and imaged dry  
229 holdfasts deposited on a clean mica surface, free of any straining. Results confirmed that *H.*  
230 *baltica* produces larger holdfasts than *C. crescentus*. *H. baltica* holdfasts have a median height  
231 of 68 nm, while *C. crescentus* produces holdfasts with median height of 19 nm (Fig. 4C-D), in  
232 agreement with previous reports (6, 36).

233 *C. crescentus* can produce holdfast by two distinct pathways, as part of a complex  
234 developmental program in a cell cycle regulated manner or upon contact with a surface,  
235 independent of the cell cycle (37-40). Some Alphaproteobacteria, such as *Asticaccaulis*  
236 *biprosthecum* (38) or *Prosthecomicrobium hirschii* (41) are also able to produce holdfasts via  
237 developmental and surface-contacted stimulated pathways, while others, like *Agrobacterium*

238 *tumefaciens*, only produce holdfasts upon contact with a surface (38, 42). To determine how  
239 holdfast production is regulated in *H. baltica*, we measured the timing of holdfasts synthesis in  
240 the presence or absence of a hard surface. To test whether *H. baltica* holdfast production can  
241 be stimulated upon contact with a surface, we performed time-lapse microscopy in a microfluidic  
242 device where cells are in close proximity with a glass surface, and we tracked single cells as  
243 they reached the surface. We observed holdfast production by including fluorescently labeled  
244 WGA in the medium, and we recorded the difference between the time when a cell first reaches  
245 the surface and the time when a holdfast is synthesized (Fig. 5A, top panels). We observed that  
246 *H. baltica* produces holdfasts within approximately 3 min upon surface contact, (Fig. 5A-B),  
247 showing that this species is able to trigger holdfast synthesis upon contact with a surface. To  
248 assess cell cycle progression and timing of holdfast synthesis independent of a surface, we  
249 tracked single cells and monitored cell differentiation and holdfast synthesis by time-lapse  
250 microscopy on soft agarose pads containing fluorescent WGA (Fig 5A, lower panel and 5B). *H.*  
251 *baltica* newborn swarmer cells produced holdfast within 15-25 minutes after budding on an  
252 agarose pad (Fig. 5A-B), showing that *H. baltica* can produce holdfasts through progression of  
253 the cell cycle, as part of a developmental pathway. To determine the timing of holdfast  
254 production relative to the cell cycle length, we measured the time required for a newborn  
255 swarmer cell to complete its first and second budding divisions on agarose pads (Fig. 5C). *H.*  
256 *baltica* swarmer cells complete their first budding within 160 - 200 mins (Fig. 5C), similarly to *C.*  
257 *crescentus* production of swarmer cells in PYE complex medium (43), meaning that the holdfast  
258 is synthesized within ~1/10 of the cell cycle, similarly to *C. crescentus* (37).

259

## 260 ***H. baltica* holdfast contains GlcNAc and galactose monosaccharides and proteins**

261 Holdfasts in diverse Alphaproteobacteria bind to WGA, showing that they contain  
262 GlcNAc residues (3). Previous studies using lectin labelling showed that GlcNAc polymers are

263 the main polysaccharide present in *C. crescentus* holdfast, while other Caulobacterales strains  
264 may have additional monosaccharides in their holdfasts (10). Indeed, WGA lectin (specific to  
265 GlcNAc) and Dolichos Biflorus agglutinin (specific to N- acetylgalactosamine) both bind  
266 *Caulobacter henricii* holdfasts (10), while *Caulobacter subvibriodes* holdfasts was shown to  
267 interact with Dolichos Biflorus Agglutinin (specific to N- acetylgalactosamine), Concanavalin A  
268 (specific to  $\alpha$ -mannose) and Ulex Europaeus agglutinin (specific to  $\alpha$ -fucose), but not WGA  
269 (10).

270 To identify the type of saccharides present in *H. baltica* holdfast, we screened a variety  
271 of fluorescent lectins to attempt to label *H. baltica* holdfast (Table 2 and Table S3). Our results  
272 indicate that, in addition to binding to WGA, *H. baltica* holdfast also binds to Solanum  
273 Tuberosum potato lectin (STL), Lycopersicon Esculentum tomato lectin (LEL), and Datura  
274 Stramonium Lectin (DSL1), all lectins specific to GlcNAc residues (Table 2), confirming that *H.*  
275 *baltica* holdfasts contain GlcNAc residues. In addition, lectins that specifically recognize  $\alpha$ -  
276 galactose residues, Griffonia Simplicifolia (GSL1), and Ricinus Communis Agglutinin 1  
277 (RCA120), also interact with *H. baltica* holdfasts (Table 2), while not binding to *C. crescentus*  
278 holdfasts (Fig. 6A). Interestingly, Soybean Agglutinin lectin (SBA) did not bind to *H. baltica*  
279 holdfasts, showing that these holdfasts only contain galactose and no N-acetylgalactosamine  
280 residues (GalNAc) (Table 2). These results show that *H. baltica* holdfasts have a different sugar  
281 composition than *Caulobacter* and contain both GlcNAc and galactose residues. To confirm that  
282 observed galactose-specific binding was holdfast dependent, we labeled *H. baltica*  $\Delta hfsA$ ,  
283  $\Delta hfsG$  (holdfast minus strains) and  $\Delta hfaB$  (holdfast shedding strain) mutants with both WGA and  
284 GSL1 lectins. None of the lectins labelled the holdfast deficient  $\Delta hfsA$  and  $\Delta hfsG$  mutants, but  
285 they labelled shed holdfast produced by the  $\Delta hfaB$  mutant (Fig. 6A), confirming that *H. baltica*  
286 holdfasts contain galactose residues.

287 *C. crescentus* holdfasts have been recently shown to contain peptides and DNA  
288 residues (15). To test whether *H. baltica* holdfast contains proteins, we attempted to label  
289 putative cysteines in the holdfast using a fluorescent maleimide dye (AF488mal). As for *C.*  
290 *crescentus* holdfasts, *H. baltica* holdfasts could be stained with AF488mal, showing that these  
291 holdfasts possess molecules with free accessible thiols, suggesting the presence of peptides  
292 containing cysteines (Fig. 6B). The staining was holdfast-specific, as AF488mal did not label the  
293 holdfast-deficient  $\Delta hfsA$  and  $\Delta hfsG$  mutants (Fig. 6B). It has been shown that in *C. crescentus*,  
294 holdfast labeling by AF488mal was specific to holdfasts attached to cells, as shed holdfasts  
295 from a holdfast anchor mutant were not labeled, suggesting that the cysteine-containing HfaD in  
296 cell-anchored holdfasts is responsible for the labeling of those holdfasts with AF488mal (15). In  
297 *H. baltica*, both the anchor proteins HfaB and HfaD contain cysteines. In order to test whether  
298 AF488mal interacts with HfaB or HfaD, we stained shed holdfasts produced by a *H. baltica*  
299  $\Delta hfaB \Delta hfaD$  double mutant and could detect staining (Fig. 6B). This is in stark contrast with *C.*  
300 *crescentus* holdfasts that react with AF488mal only when attached to WT cells (15, 44). This  
301 result show that the holdfast composition in these two microorganisms is different.

302 To probe for the presence of DNA in *H. baltica* holdfasts, we labeled holdfasts with the  
303 fluorescent DNA dye YOYO-1 that binds to double-stranded DNA molecules. As previously  
304 reported, *C. crescentus* holdfasts was labeled with YOYO-1 (15). However, YOYO-1 failed to  
305 label *H. baltica* holdfasts (Fig. 6C), suggesting that *H. baltica* holdfasts do not contain DNA. It  
306 has been previously shown that, in *C. crescentus*, extracellular DNA (eDNA) released during *C.*  
307 *crescentus* cell lysis binds specifically to *C. crescentus* holdfasts, preventing adhesion to  
308 surfaces and biofilm formation (45), and it has been hypothesized that it could be due to a  
309 specific interaction between the DNA present in the holdfast and eDNA (15). We showed above  
310 that *H. baltica* holdfasts were devoid of DNA, so we tested whether eDNA could inhibit *H. baltica*  
311 binding. We performed short term adhesion assays in the presence of *H. baltica* and *C.*

312 *crenscentus* eDNA (Fig. S2A). When *C. crescentus* eDNA is present, the number of *C.*  
313 *crenscentus* attached to the glass slide after 60 minutes is dramatically decreased, compared to  
314 when *H. baltica* eDNA is added and to the no DNA addition control (Fig S2A), confirming  
315 previous studies that showed that, in *C. crescentus*, eDNA inhibition was specific for *C.*  
316 *crenscentus* eDNA (45). However, *H. baltica* adhesion is not impaired by the presence of eDNA,  
317 from itself or from *C. crescentus* (Fig. S2A). We also performed long term biofilm assays in the  
318 presence of eDNA and showed that *H. baltica* biofilm formation is not impaired by the presence  
319 of eDNA in the medium after 24 h of incubation (Fig. S2B).

320 Taken together, we show that *H. baltica* holdfasts are different from *C. crescentus* ones:  
321 they are larger, contain GlcNAc, galactose, and peptide residues, but are void of DNA.

322

### 323 ***H. baltica* holdfast tolerates high ionic strength**

324 It has been shown that *C. crescentus* holdfasts are very sensitive to ionic strength, as  
325 purified holdfast binding efficiency to glass decreased by 50% with addition of 10 mM NaCl (6).  
326 *C. crescentus* is a freshwater bacterium and has probably evolved without selective pressure to  
327 bind under high ionic strength. This compelled us to investigate how the holdfasts from *H.*  
328 *baltica* are affected by ionic strength. We first used NaCl to study the effects of ionic strength on  
329 holdfast binding, since it is the most abundant ionic elements in marine water and it has been  
330 used in many studies to assess the effect of ionic strength on bacterial adhesins (6, 46-48). We  
331 quantified purified holdfast binding to glass at different NaCl concentrations, using fluorescent  
332 WGA, and plotted the relative number of holdfasts per field of view bound to glass at different  
333 concentrations of NaCl (Fig. 7A-B). Our results confirmed that *C. crescentus* holdfast is very  
334 sensitive to NaCl, as only 50% of holdfasts can bind to glass when 10 mM NaCl is added (Fig.  
335 7B). However, *H. baltica* holdfast tolerated up to 500 mM NaCl without any effect on surface  
336 binding (Fig. 7B). There was a 50% decrease in *H. baltica* holdfast binding at 600 mM (Fig. 7B),

337 showing that *H. baltica* holdfasts are more than 50 times more resistant to NaCl than those of *C.*  
338 *crescentus*. *H. baltica* was originally isolated from the Baltic Sea, which has 250 mM NaCl (Fig  
339 7B, gray arrow) (26), and at that NaCl concentration, the binding efficiency of *H. baltica*  
340 holdfasts is maximal. Interestingly, *H. baltica* holdfasts still bound efficiently at low ionic  
341 strength. We observed similar results using different concentrations of MgSO<sub>4</sub> (Fig. 7C): *H.*  
342 *baltica* holdfasts were 50 times more resistant to MgSO<sub>4</sub> than those of *C. crescentus*, showing  
343 that the binding inhibition is not specific to NaCl but is rather dependent on ionic strength.

344 Our results show that, in *H. baltica*, initial holdfast binding to glass is not changed for  
345 NaCl concentrations up to 500 mM, then drastically decreased to reach around 25% of holdfasts  
346 attached at 1 M NaCl (Fig. 7B). To test whether high ionic strength could remove holdfasts  
347 previously attached to the glass surface, we first incubated purified holdfasts for 4 h without any  
348 salt added, and then added 1M of NaCl for 12 hours to the bound holdfasts (Fig. 7D). Bound  
349 holdfasts from *H. baltica* and *C. crescentus* were not dislodged from the glass surface (Fig. 7D  
350 and E), indicating that while high ionic strength inhibits holdfast from binding to the surface, it  
351 cannot dislodge bound holdfast from a glass surface (Fig. 7E).

352

## 353 **DISCUSSION**

354 Different bacterial species harbor an adhesive holdfast and use it to attach to surfaces  
355 (2, 3, 9, 49, 50). They represent an extremely diverse group in terms of their physiology and the  
356 natural environments they inhabit (soil, freshwater, and marine environments). They have  
357 evolved the ability to adhere to surfaces with vastly different composition in varying  
358 environmental conditions (salinity, pH, temperature, etc.). Holdfast chemical properties have  
359 been mainly studied in the model organism *C. crescentus*, a freshwater Caulobacterale (6, 10,  
360 13, 15, 18, 28, 32, 36, 51), and little is known about holdfast properties and composition in  
361 marine Caulobacterales. In this study, we used *H. baltica* as a model species living in a marine

362 environment and found that this bacterium has a holdfast tailored for adhesion in high salinity  
363 conditions. We show that holdfasts in *H. baltica* are different than those of *C. crescentus*: they  
364 are larger, have a different chemical composition, and have a high tolerance to ionic strength.

365 The bioinformatics analysis of holdfast genes indicated that the *hfs* and *hfa* loci are  
366 highly conserved among Caulobacterales, with few reshufflings of these genes (Fig. 1C). The  
367 arrangements of the holdfast genes in the *hfs* and *hfa* loci appears to be ancestral while the  
368 relocation of some of the genes is a recent event that could affect their level of expression (52).  
369 Through deletion and complementation of important *hfs* and *hfa* genes, we confirmed that  
370 holdfast biogenesis and anchoring to the cell body in *H. baltica* use similar genes to those  
371 identified in *C. crescentus* (2);(18) (Fig 2).

372 We showed that the two glycosyltransferases *hfsL* and *hfsG*, are essential for holdfast  
373 production and regulate the amount of sugar monosaccharides added to holdfast  
374 polysaccharides, as cells expressing low levels of these proteins produce smaller holdfasts (Fig.  
375 2, 3). Small holdfasts with less polysaccharides binds to glass but not strongly enough to  
376 support cells (Fig. 3). This phenomenon could be due to the smaller surface contact area  
377 between the small holdfasts being insufficient to resist drag and shear forces during the washing  
378 steps of our assays or to a change in holdfast structure or composition due to the lower  
379 expression of the glycosyltransferases HfsL and HfsG. More studies on the role of HfsL and  
380 HfsG will help us to determine if these enzymes play an important role in specific  
381 physicochemical properties of *H. baltica* holdfasts.

382 In *C. crescentus*, the growing holdfast polysaccharide repeat units are modified by the  
383 acetyltransferase HfsK (32) and the polysaccharide deacetylase HfsH (21) (Fig. 1A). These two  
384 enzymes are not essential for holdfast production in *C. crescentus*, but modify adhesiveness  
385 and cohesiveness of the holdfast. Holdfasts produced by  $\Delta hfsH$  or  $\Delta hfsK$  mutants produced  
386 thread-like holdfasts with weaker adhesion strength (28, 32). In addition, fully acetylated purified  
387 holdfasts from the *C. crescentus*  $\Delta hfsH$  mutant holdfasts were not affected by ionic strength (6),



388 suggesting that holdfast modification can modulate salt tolerance. Our future work will determine  
389 how holdfast modification impacts *H. baltica* holdfasts tolerance to high ionic, and the possible  
390 role of HfsH and HfsK.

391         The exact composition and structure of holdfast is still unknown in the model organism  
392 *C. crescentus*. Lectin binding assays and lysozyme treatment support GlcNAc as one of the  
393 important components in holdfasts (10, 36). Treating holdfast with proteinase K and DNase I  
394 affects *C. crescentus* holdfast structure and force of adhesion, suggesting that it contains  
395 peptide and DNA residues (15). In this work, we identified different components present in *H.*  
396 *baltica* holdfasts: these holdfasts contain galactose monosaccharides in addition to GlcNAc (Fig.  
397 6A). In the different *hfs* mutants generated in this study, galactose monosaccharides were not  
398 detected on the cell pole (Fig. 6A), suggesting that GlcNAc and galactose are produced  
399 together or secreted by the same proteins. Shed holdfasts from *H. baltica*  $\Delta hfaB$  contain both  
400 GlcNAc and galactose (Fig. 6A), implying that they are both anchored to the cell envelope with  
401 the same anchor proteins. *H. baltica* holdfasts are void of DNA, a stark contrast to *C. crescentus*  
402 (Fig. 6C). In addition, *H. baltica* holdfasts could be successfully stained with a fluorescent  
403 maleimide dye, which suggest the presence of a protein or peptide with a cysteine residue (53).  
404 The maleimide dye stains only cells with a holdfast, and interacts with holdfasts without the  
405 presence of cells, indicating that the reactive molecules are intrinsic part of *H. baltica* holdfast  
406 (Fig. 6B), another notable difference with *C. crescentus* holdfasts where maleimide dye only  
407 interacts with holdfasts attached to cells (15). Our results suggest that the two holdfasts from *H.*  
408 *baltica* and *C. crescentus* have different composition.

409         Bacterial adhesins have been shown to use electrostatic and hydrophobic interactions to  
410 attach to surfaces (6). Electrostatic interactions are impaired in high ionic environment like  
411 seawater with 600 mM of NaCl (7). *C. crescentus* holdfast uses both ionic and hydrophobic  
412 interactions and its binding is impaired in presence of NaCl in the media (6). We have shown

413 that *H. baltica* holdfasts tolerate high ionic strength compared to *C. crescentus* (Fig. 7A-C).  
414 Marine Caulobacterales face a higher ionic strength environment than the freshwater bacteria,  
415 therefore, it is vital that marine Caulobacterales produce holdfasts that are more tolerant to ionic  
416 strength and strongly adhere in saline environments. Holdfasts do not efficiently bind at 1 M  
417 NaCl, but holdfasts already attached to a surface cannot be removed when adding 1 M NaCl  
418 (Fig. 7D), suggesting that the binding inhibition at 1 M NaCl takes place during the initial stage  
419 of surface interaction, because it has no effect on surface bound holdfasts (Fig. 7D). These  
420 results imply that holdfast interacts with surfaces initially using electrostatic interactions, before  
421 a permanent molecular bond is formed (6, 54). The differences in ionic tolerance between fresh  
422 and marine Caulobacterales indicates that there are significant differences in physicochemical  
423 properties between the two types of holdfasts. Holdfast structure and binding properties could  
424 depend on the type and the amount of sugars polymerized in the holdfast polysaccharide that  
425 are specialized to interact with different surfaces (55).

426 In conclusion, we have shown that *H. baltica* produces holdfasts with different binding  
427 and physicochemical properties compared to *C. crescentus* holdfasts. This could suggest that  
428 there are additional holdfast related genes or regulators that have not been identified. A careful  
429 genetic screen in *H. baltica* will provide more insights about holdfast production and the  
430 underlying mechanisms yielding to an enhanced adhesion at high ionic strength. The molecular  
431 mechanism by which *H. baltica* and other marine Caulobacterales overcome the effect of ionic  
432 strength on holdfast binding will be our next focus.

433

434

## 435 MATERIALS AND METHODS

436

### 437 Identification of orthologous holdfast genes and phylogenetic analysis.

438 *C. crescentus* holdfast genes were used to find bi-directional best hits (BBH) on  
439 Caulobacterales genomes. The putative genes were selected for E<sup>-</sup> value > 10<sup>-4</sup> and sequence  
440 identify > 30%. The phylogenetic tree was built using 16S rRNA sequences of the selected  
441 Caulobacterales. Sequences were aligned using MUSCLE software (46). The aligned  
442 sequences were used to construct the maximum likelihood phylogeny using the MEGA6  
443 software (58). The LG+G+I models and analysis of 1000 bootstraps were used to generate the  
444 nodes values for each clade.

445

### 446 Bacterial strains and growth conditions.

447 The bacterial strains used in this study are listed in Table S1. *H. baltica* strains were  
448 grown in marine medium (Difco Marine Broth/Agar reference 2216), except when studying the  
449 effect of ionic strength on holdfast binding where they were grown in Peptone Yeast Extract  
450 (PYE) medium (8) supplemented with 0 or 1.5% NaCl or MgSO<sub>4</sub>. *C. crescentus* was grown in  
451 PYE medium. Both *H. baltica* and *C. crescentus* strains were grown at 30 °C. When appropriate,  
452 antibiotics were added to the following concentrations: kanamycin (Kan) 5 µg/ml in liquid and 20  
453 µg/ml on agarose plates. *H. baltica* strains with copper inducible promoter were grown in marine  
454 broth supplemented with 0-250 µM of CuSO<sub>4</sub>. *E. coli* strains were grown in Luria-Bertani  
455 medium (LB) at 37 °C with no antibiotics or with 30 µg/ml of Kan in liquid or 25 µg/ml on agarose  
456 plate when needed.

457

### 458 Strains construction.

459 All the plasmids and primers used in this study are listed on Table S1 and S2  
460 respectively. In-frame deletion mutants were obtained by double homologous recombination as

461 previously described (59), using suicide plasmids transformed into the *H. baltica* host strains by  
462 mating or electroporation (60). Briefly, genomic DNA was used as the template to PCR-amplify  
463 500 bp fragments from upstream and downstream regions of the gene to be deleted. pNPTS139  
464 plasmid was cut using EcoRV-HF endonuclease from New England Biolabs. The primers used  
465 to amplify 500 bp upstream and downstream of the gene were designed to have overlapping 25  
466 bp for isothermal assembly (61) using the New England Biolabs (NEB) NEBuilder tools for  
467 Gibson assembly into plasmid pNPTS139. Then pNPTS139-based constructs were transformed  
468 into  $\alpha$ -select *E. coli* strain and introduced in the host *H. baltica* by mating or electroporation (62).  
469 The two-step selection for homologous recombination was carried out using sucrose resistance  
470 and kanamycin sensitivity (63).

471 For gene complementation, the pMR10 plasmid was cut with EcoRV-HF and 500 bp of  
472 the promoter and the gene were ligated into plasmid pMR10 using NEBuilder tools. The pMR10-  
473 based constructs were transformed into  $\alpha$ -select *E. coli* strain and introduced in the host *H.*  
474 *baltica* by mating or electroporation, followed by Kan selection. The plasmid constructs and  
475 mutants were confirmed by sequencing.

476

#### 477 **Holdfast labeling using fluorescently labeled lectins**

478 Alexa Fluor (AF) conjugated lectins (Vector Labs, Table 2 and Table S3) were added to  
479 100  $\mu$ l of exponential culture to a final concentration of 0.5  $\mu$ g/ml and incubated at room  
480 temperature for 5 min. 3  $\mu$ l of the labeled culture was spotted on glass cover slide and covered  
481 with 1.5 % (w/v) SeaKem LE agarose (Lonza) pad in water and visualized by epifluorescence  
482 microscopy. Holdfasts were imaged by epifluorescence microscopy using an inverted Nikon Ti-  
483 E microscope with a Plan Apo 60X objective, a GFP/DsRed filter cube, an Andor iXon3 DU885  
484 EM CCD camera and Nikon NIS Elements imaging software with 200 ms exposure time.  
485 Images were processed in ImageJ (64).

486

#### 487 **Short-term and biofilm binding assays**

488           This assay was performed as previously described (28) with the following modification.  
489 For short-term binding, exponential cultures ( $OD_{600} = 0.6 - 0.8$ ) were diluted to  $OD_{600} = 0.4$  in  
490 fresh marine broth, added into 24-well plate (1 ml per well), and incubated shaking (100 rpm) at  
491 room temperature for 4 h. For biofilm assays, overnight cultures were diluted to  $OD_{600} = 0.10$ ,  
492 added to 24-well plate (1 ml per well), and incubated at room temperature for 12 hours with  
493 shaking (100 rpm). In both set-ups,  $OD_{600}$  were measured before the wells were rinsed with  
494 distilled  $H_2O$  to remove non-attached bacteria, stained using 0.1% crystal violet (CV) and rinsed  
495 again with  $dH_2O$  to remove excess CV. The CV was dissolved into 10% (v/v) acetic acid and  
496 quantified by measuring the absorbance at 600 nm ( $A_{600}$ ). The biofilm formation was normalized  
497 to  $A_{600} / OD_{600}$  and expressed as a percentage of WT.

498

#### 499 ***hfsL* and *hfsG* expression using copper inducible promoter.**

500           Strains bearing copper inducible plasmids were inoculated from freshly grown colonies  
501 into 5 ml marine broth containing 5  $\mu\text{g/ml}$  Kan and incubated shaking (200 rpm) at 30°C  
502 overnight. Overnight cultures were diluted in the same culture medium to  $OD_{600} = 0.10$  and  
503 incubated until  $OD_{600} = 0.4$  was reached. When needed, copper sulfate dissolved in marine  
504 broth was added to a final concentration of 0-250  $\mu\text{M}$ . The induced cultures and controls were  
505 added to 24-well plate (1 ml per well) and incubated shaking (100rpm) at room temperature for  
506 4-8 h. Then,  $OD_{600}$  were measured before the wells were rinsed with distilled  $H_2O$  to remove  
507 non-attached bacteria, stained using 0.1% crystal violet (CV) and rinsed again with  $dH_2O$  to  
508 remove excess CV. The CV was dissolved into 10% (v/v) acetic acid and quantified by  
509 measuring the absorbance at 600 nm ( $A_{600}$ ). The biofilm formation was normalized to  $A_{600} /$   
510  $OD_{600}$  and expressed as a percentage of WT.

511

## 512 **Visualization of holdfasts attached on a glass surface**

513 Visualization of holdfast binding to glass surfaces were performed as described  
514 previously in (28) with the following modification. *H. baltica* and *C. crescentus* strains grown to  
515 exponential phase ( $OD_{600} = 0.2 - 0.6$ ) were incubated on washed glass coverslips at room  
516 temperature in a saturated humidity chamber for 4 - 8 h. After incubation, the slides were rinsed  
517 with  $dH_2O$  to remove unbound cells, and holdfasts were labelled using 50  $\mu$ l of fluorescent Alexa  
518 Fluor (AF488 or AF594) conjugated lectins (Molecular Probes or Vector Labs, Table 2) at a final  
519 concentration of 0.5  $\mu$ g/ml. Then, slides were rinsed with  $dH_2O$  and topped with a glass  
520 coverslip. Holdfasts were imaged by epifluorescence microscopy using an inverted Nikon Ti-E  
521 microscope with a Plan Apo 60X objective, a GFP/DsRed filter cube, an Andor iXon3 DU885  
522 EM CCD camera and Nikon NIS Elements imaging software with 200 ms exposure time.  
523 Images were processed in ImageJ (64).

524

## 525 **Atomic Force Microscopy (AFM)**

526 AFM imaging was performed using the tapping mode on a Cypher AFM (Asylum  
527 Research) at 20°C, as described previously (6, 19) with the following modifications. Exponential  
528 phase grown *H. baltica*  $\Delta hfaB$  and *C. crescentus*  $\Delta hfaB$  were diluted and spotted on a freshly  
529 cleaved mica. Samples were grown overnight at room temperature in a humid chamber. The  
530 samples were then rinsed with sterile  $dH_2O$  to remove unbound cells and debris, and air-dried.  
531 AFM topographic images of dried holdfasts attached to the mica surface were obtained using a  
532 silicon Olympus AC160TS cantilever (Resonance frequency = 300 kHz, Spring constant = 26  
533 N/m). 40 images of 4 independent replicates were obtained. Holdfast height was determined  
534 using the built-in image analysis function of the Igor Pro/Asylum Research AFM software.

535

## 536 **Holdfast synthesis timing by time-lapse microscopy on agarose pads.**

537 *H. baltica* holdfast synthesis timing were observed in live cells on agarose pads by time-  
538 lapse microscopy as described previously (39) with some modifications. A 1  $\mu$ l aliquot of  
539 exponential-phase cells ( $OD_{600} = 0.4 - 0.8$ ) was placed on top of a pad containing 0.8% agarose  
540 in marine broth with 0.5  $\mu$ g/ml AF-WGA 488. A coverslip was placed on top of the agarose pad  
541 and sealed with VALAP (Vaseline, lanolin and paraffin wax). Time-lapse microscopy images  
542 were taken every 2 min for 4 h using an inverted Nikon Ti-E microscope and a Plan Apo 60X  
543 objective, a GFP/DsRed filter cube, and an Andor iXon3 DU885 EM CCD camera. Time-lapse  
544 movies were visualized in ImageJ (64) to manually assess the timing of a swarmer cell  
545 producing holdfast (lectin detection) after budding. The time difference between holdfast  
546 synthesis and budding was determined using MicrobeJ (65).

547

#### 548 **Holdfast synthesis timing by time-lapse microscopy on microfluidic device.**

549 This experiment was performed as previously described (40) with the following  
550 modifications. Cell cultures were grown to mid-exponential phase ( $OD_{600} = 0.4 - 0.6$ ) and 200  $\mu$ l  
551 of culture was diluted into 800  $\mu$ l fresh marine broth in the presence of 0.5  $\mu$ g/ml AF-WGA 488  
552 for holdfast labeling. One ml of the cell culture was flushed into a microfluidic device containing  
553 a 10  $\mu$ m high linear chamber fabricated in PDMS (Polydimethylsiloxane) as described  
554 previously (39). After injection of the cells into the microfluidic chamber, the flow rate was  
555 adjusted so that attachment could be observed under static conditions or low flow rate.

556 Time-lapse microscopy was performed using an inverted Nikon Ti-E microscope and a  
557 Plan Apo 60X objective, a GFP/DsRed filter cube, an Andor iXon3 DU885 EM CCD camera and  
558 Nikon NIS Elements imaging software. Time-lapse videos were collected for strains over a  
559 period of 3 h at 20-second intervals. Cell attachment was detected at the glass-liquid interface  
560 within the microfluidic chamber using phase contrast microscopy while holdfast synthesis was  
561 detected using fluorescence microscopy. Cells that hit the surface and attached permanently via  
562 their holdfast during this 3 h period were analyzed for the timing of holdfast synthesis. The time

563 difference between holdfast synthesis and cell-surface contact was determined using MicrobeJ  
564 (65) and define as holdfast delay. Cells that were present on the surface at the start of the time-  
565 lapse experiment were not analyzed.

566

#### 567 **Holdfast labeling using fluorescently labeled Maleimide and YOYO-1**

568 Alexa Fluor (AF-mal488) conjugated Maleimide C<sub>5</sub> (ThermoFisher Scientific) were added  
569 to 100 µl of exponential culture to a final concentration of 0.5 µg/ml and incubated at room  
570 temperature for 5 mins. Similarly, YOYO-1 (fluorescent DNA stain, Molecular Probes) was  
571 added to 100ul of exponential culture to a final concentration of 0.5 µg/ml and incubated at room  
572 temperature for 5 mins. 3 µl of the labeled culture was spotted on glass cover slide and covered  
573 with 1.5 % (w/v) agarose pad in water and visualized by epifluorescence microscopy. Holdfasts  
574 were imaged by epifluorescence microscopy using an inverted Nikon Ti-E microscope with a  
575 Plan Apo 60X objective, a GFP/DsRed filter cube, an Andor iXon3 DU885 EM CCD camera and  
576 Nikon NIS Elements imaging software with 200 ms exposure time. Images were processed in  
577 ImageJ (64).

578

#### 579 **Effect of ionic strength on holdfast binding.**

580 Purified holdfasts attached to a surface in different ionic strength were visualized as  
581 described previously (Berne *et al.*, 2013), with few modifications. Briefly, *H. baltica*  $\Delta hfaB$  and *C.*  
582 *crescentus*  $\Delta hfaB$  cells were grown to late exponential phase ( $OD_{600} = 0.6 - 0.8$ ) in PYE + 1.5%  
583 NaCl, and plain PYE respectively. The cells were pelleted by centrifugation for 30 min at 4,000 x  
584 g and resuspended in PYE and incubated for 2 h at 30 °C. Then, the cells were again pelleted  
585 by centrifugation and 100 µl of supernatant, containing free holdfasts shed by the cells, were  
586 mixed with 100 µl of NaCl in PYE to make a final concentration of 0 - 1000 mM of NaCl. 50 µl of  
587 the mixture was incubated on washed glass coverslips at room temperature in a saturated  
588 humidity chamber for 4 - 12 h. After incubation, the slides were rinsed with dH<sub>2</sub>O to remove



589 unbound material, and labelled holdfast were visualized with Alexa Fluor lectins (Vector labs).  
590 Holdfasts were imaged by epifluorescence microscopy using an inverted Nikon Ti-E microscope  
591 with a Plan Apo 60X objective, a GFP/DsRed filter cube, an Andor iXon3 DU885 EM CCD  
592 camera and Nikon NIS Elements imaging software with 200 ms exposure time. Images were  
593 processed in ImageJ (64). The number of holdfasts bound per field of view was quantified using  
594 MicrobeJ (65).

595

### 596 **$\beta$ -galactosidase assays to assess copper inducible *copA* promoter activity.**

597 This assay was performed as previously described with few modification (44). Strains  
598 bearing plasmids with *lacZ* gene controlled by copper inducible promoter *copAB* were  
599 inoculated from freshly grown colonies into 5 ml marine broth containing 5  $\mu$ g/ml Kan and  
600 incubated at 30°C overnight. Overnight cultures were diluted in the same culture medium to  
601  $OD_{600} = 0.10$  and incubated until an  $OD_{600} = 0.4$  was reached, where copper sulfate dissolved in  
602 marine broth was added to a final concentration of 0 - 250  $\mu$ M. The induced cultures and  
603 controls were incubated for 2 - 4 h at 30 °C.  $\beta$ -galactosidase activity was measured  
604 colorimetrically as described previously (66). Briefly, 200  $\mu$ l of culture was mixed with 600  $\mu$ l Z  
605 buffer (60 mM  $Na_2HPO_4$ , 40 mM  $NaH_2PO_4$ , 10 mM KCl, 1 mM  $MgSO_4$ , 50 mM  $\beta$ -  
606 mercaptoethanol). Cells were then permeabilized using 50  $\mu$ l chloroform and 25  $\mu$ l 0.1% SDS.  
607 200  $\mu$ l of substrate *o*-nitrophenyl-  $\beta$ -D-galactoside (4 mg/ml) was added to the permeabilized  
608 cells. Upon development of a yellow color, the reaction was stopped by raising the pH to 11 with  
609 addition of 400 $\mu$ l of 1M  $Na_2CO_3$ . Absorbance at 420 nm ( $A_{420}$ ) was determined and the Miller  
610 Units of  $\beta$ -galactosidase activity were calculated as  $(A_{420})(1000)/(OD_{600})(t)(v)$  where  $t$  is the time  
611 in minutes and  $v$  is the volume of culture used in the assay in mL.

612

### 613 **Growth measurements.**

614 Impact of CuSO<sub>4</sub> on *H. baltica* growth was measured using 24-well plates. 1 ml of cultures  
615 (Starting OD<sub>600</sub> = 0.05) were incubated for 12 h at 30°C, using marine Broth and various CuSO<sub>4</sub>  
616 concentrations. OD<sub>600</sub> were recorded after overnight incubation, to determine the growth yield for  
617 the different CuSO<sub>4</sub> concentrations. Growth curves using 0 or 500 µM CuSO<sub>4</sub> were recorded  
618 every 30 minutes for 20 h. All OD<sub>600</sub> were recorded using a Biotek Synergy HT.  
619

## 620 REFERENCES

- 621 1. Costerton JW, Cheng KJ, Geesey GG, Ladd TI, Nickel JC, Dasgupta M, Marrie TJ. 1987.  
622 Bacterial biofilms in nature and disease. *Annu Rev Microbiol* 41:435-64.
- 623 2. Berne C, Ellison CK, Ducret A, Brun YV. 2018. Bacterial adhesion at the single-cell level. *Nat Rev*  
624 *Microbiol* 16:616-27.
- 625 3. Berne C, Ducret A, Hardy GG, Brun YV. 2015. Adhesins involved in attachment to abiotic  
626 surfaces by Gram-negative bacteria. *Microbiology spectrum* 3.
- 627 4. Donlan RM. 2002. Biofilms: microbial life on surfaces. *Emerging infectious diseases* 8:881.
- 628 5. Abu-Lail N, Camesano T. 2003. Polysaccharide properties probed with atomic force microscopy.  
629 *Journal of Microscopy* 212:217-238.
- 630 6. Berne Cc, Ma X, Licata NA, Neves BR, Setayeshgar S, Brun YV, Dragnea B. 2013.  
631 Physicochemical properties of *Caulobacter crescentus* holdfast: a localized bacterial adhesive.  
632 *The Journal of Physical Chemistry B* 117:10492-10503.
- 633 7. Garrels R, Thompson M. 1962. A chemical model for sea water at 25 degrees C and one  
634 atmosphere total pressure. *American Journal of Science* 260:57-66.
- 635 8. Poindexter JS. 1964. Biological properties and classification of the *Caulobacter* group.  
636 *Bacteriological reviews* 28:231.
- 637 9. Wilhelm R. 2018. Following the terrestrial tracks of *Caulobacter*-redefining the ecology of a  
638 reputed aquatic oligotroph. *ISME J*.
- 639 10. Merker RI, Smit J. 1988. Characterization of the adhesive holdfast of marine and freshwater  
640 caulobacters. *Applied and environmental microbiology* 54:2078-2085.
- 641 11. Ong CJ, Wong M, Smit J. 1990. Attachment of the adhesive holdfast organelle to the cellular stalk  
642 of *Caulobacter crescentus*. *Journal of bacteriology* 172:1448-1456.
- 643 12. Brown PJ, Hardy GG, Trimble MJ, Brun YV. 2008. Complex regulatory pathways coordinate cell-  
644 cycle progression and development in *Caulobacter crescentus*. *Advances in microbial physiology*  
645 54:1-101.
- 646 13. Tsang PH, Li G, Brun YV, Freund LB, Tang JX. 2006. Adhesion of single bacterial cells in the  
647 micronewton range. *Proceedings of the National Academy of Sciences* 103:5764-5768.
- 648 14. Henrici AT, Johnson DE. 1935. Studies of Freshwater Bacteria: II. Stalked Bacteria, a New Order  
649 of Schizomycetes 1. *Journal of Bacteriology* 30:61.
- 650 15. Hernando-Pérez M, Setayeshgar S, Hou Y, Temam R, Brun YV, Dragnea B, Berne C. 2018.  
651 Layered Structure and Complex Mechanochemistry Underlie Strength and Versatility in a  
652 Bacterial Adhesive. *mBio* 9:e02359-17.
- 653 16. Cuthbertson L, Mainprize IL, Naismith JH, Whitfield C. 2009. Pivotal roles of the outer membrane  
654 polysaccharide export and polysaccharide copolymerase protein families in export of extracellular  
655 polysaccharides in gram-negative bacteria. *Microbiology and Molecular Biology Reviews* 73:155-  
656 177.
- 657 17. Toh E, Kurtz HD, Brun YV. 2008. Characterization of the *Caulobacter crescentus* holdfast  
658 polysaccharide biosynthesis pathway reveals significant redundancy in the initiating  
659 glycosyltransferase and polymerase steps. *Journal of bacteriology* 190:7219-7231.
- 660 18. Hershey DM, Fiebig A, Crosson S. 2018. A genome-wide analysis of adhesion in *Caulobacter*  
661 *crescentus* identifies new regulatory and biosynthetic components for holdfast assembly.  
662 *bioRxiv*:446781.
- 663 19. Hardy GG, Toh E, Berne C, Brun YV. 2018. Mutations in Sugar-Nucleotide Synthesis Genes  
664 Restore Holdfast Polysaccharide Anchoring to *Caulobacter crescentus* Holdfast Anchor Mutants.  
665 *Journal of bacteriology* 200:e00597-17.
- 666 20. Smith CS, Hinz A, Bodenmiller D, Larson DE, Brun YV. 2003. Identification of genes required for  
667 synthesis of the adhesive holdfast in *Caulobacter crescentus*. *Journal of bacteriology* 185:1432-  
668 1442.
- 669 21. Javens J, Wan Z, Hardy GG, Brun YV. 2013. Bypassing the need for subcellular localization of a  
670 polysaccharide export-anchor complex by overexpressing its protein subunits. *Molecular*  
671 *microbiology* 89:350-371.
- 672 22. Kurtz Jr HD, Smith J. 1994. The *Caulobacter crescentus* holdfast: identification of holdfast  
673 attachment complex genes. *FEMS microbiology letters* 116:175-182.

- 674 23. Cole JL, Hardy GG, Bodenmiller D, Toh E, Hinz A, Brun YV. 2003. The HfaB and HfaD adhesion  
675 proteins of *Caulobacter crescentus* are localized in the stalk. *Molecular microbiology* 49:1671-  
676 1683.
- 677 24. Hardy GG, Allen RC, Toh E, Long M, Brown PJ, Cole-Tobian JL, Brun YV. 2010. A localized  
678 multimeric anchor attaches the *Caulobacter* holdfast to the cell pole. *Molecular microbiology*  
679 76:409-427.
- 680 25. Kurtz H, Smith J. 1992. Analysis of a *Caulobacter crescentus* gene cluster involved in attachment  
681 of the holdfast to the cell. *Journal of bacteriology* 174:687-694.
- 682 26. Schlesner H, Bartels C, Sittig M, Dorsch M, Stackebrandt E. 1990. Taxonomic and Phylogenetic  
683 Studies on a New Taxon of Budding, Hyphal Proteobacteria, *Hirschia baltica* gen. nov., sp. nov.  
684 *International Journal of Systematic and Evolutionary Microbiology* 40:443-451.
- 685 27. Chertkov O, Brown PJ, Kysela DT, Pedro MA, Lucas S, Copeland A, Lapidus A, Del Rio TG, Tice  
686 H, Bruce D. 2011. Complete genome sequence of *Hirschia baltica* type strain (IFAM 1418 T).  
687 *Standards in genomic sciences* 5:287.
- 688 28. Wan Z, Brown PJ, Elliott EN, Brun YV. 2013. The adhesive and cohesive properties of a bacterial  
689 polysaccharide adhesin are modulated by a deacetylase. *Molecular microbiology* 88:486-500.
- 690 29. Nierman WC, Feldblyum TV, Laub MT, Paulsen IT, Nelson KE, Eisen J, Heidelberg JF, Alley M,  
691 Ohta N, Maddock JR. 2001. Complete genome sequence of *Caulobacter crescentus*.  
692 *Proceedings of the National Academy of Sciences* 98:4136-4141.
- 693 30. Marks ME, Castro-Rojas CM, Teiling C, Du L, Kapatral V, Walunas TL, Crosson S. 2010. The  
694 genetic basis of laboratory adaptation in *Caulobacter crescentus*. *Journal of bacteriology*  
695 192:3678-3688.
- 696 31. Fiebig A, Herrou J, Fumeaux C, Radhakrishnan SK, Viollier PH, Crosson S. 2014. A cell cycle  
697 and nutritional checkpoint controlling bacterial surface adhesion. *PLoS genetics* 10:e1004101.
- 698 32. Sprecher KS, Hug I, Nesper J, Potthoff E, Mahi M-A, Sangermani M, Kaever V, Schwede T,  
699 Vorholt J, Jenal U. 2017. Cohesive properties of the *Caulobacter crescentus* holdfast adhesin are  
700 regulated by a novel c-di-GMP effector protein. *MBio* 8:e00294-17.
- 701 33. Fritts RK, LaSarre B, Stoner AM, Posto AL, McKinlay JB. 2017. A Rhizobiales-specific unipolar  
702 polysaccharide adhesin contributes to *Rhodopseudomonas palustris* biofilm formation across  
703 diverse photoheterotrophic conditions. *Applied and environmental microbiology* 83:e03035-16.
- 704 34. Thompson MA, Onyeziri MC, Fuqua C. 2018. Function and Regulation of *Agrobacterium*  
705 *tumefaciens* Cell Surface Structures that Promote Attachment.
- 706 35. Jung A, Eisheuer S, Cserti E, Leicht O, Strobel W, Möll A, Schlimpert S, Kühn J, Thanbichler M.  
707 2015. Molecular toolbox for genetic manipulation of the stalked budding bacterium *Hyphomonas*  
708 *neptunium*. *Applied and environmental microbiology* 81:736-744.
- 709 36. Li G, Smith CS, Brun YV, Tang JX. 2005. The elastic properties of the *Caulobacter crescentus*  
710 adhesive holdfast are dependent on oligomers of N-acetylglucosamine. *Journal of bacteriology*  
711 187:257-265.
- 712 37. Levi A, Jenal U. 2006. Holdfast formation in motile swarmer cells optimizes surface attachment  
713 during *Caulobacter crescentus* development. *Journal of bacteriology* 188:5315-5318.
- 714 38. Li G, Brown PJ, Tang JX, Xu J, Quardokus EM, Fuqua C, Brun YV. 2012. Surface contact  
715 stimulates the just-in-time deployment of bacterial adhesins. *Molecular microbiology* 83:41-51.
- 716 39. Hoffman MD, Zucker LI, Brown PJ, Kysela DT, Brun YV, Jacobson SC. 2015. Timescales and  
717 frequencies of reversible and irreversible adhesion events of single bacterial cells. *Analytical*  
718 *chemistry* 87:12032-12039.
- 719 40. Ellison CK, Kan J, Dillard RS, Kysela DT, Ducret A, Berne C, Hampton CM, Ke Z, Wright ER,  
720 Biais N. 2017. Obstruction of pilus retraction stimulates bacterial surface sensing. *Science*  
721 358:535-538.
- 722 41. Williams M, Hoffman MD, Daniel JJ, Madren SM, Dhroso A, Korkin D, Givan SA, Jacobson SC,  
723 Brown PJ. 2016. Short-stalked *Prosthecomicrobium hirschii* cells have a *Caulobacter*-like cell  
724 cycle. *Journal of bacteriology*:JB. 00896-15.
- 725 42. Tomlinson AD, Fuqua C. 2009. Mechanisms and regulation of polar surface attachment in  
726 *Agrobacterium tumefaciens*. *Current opinion in microbiology* 12:708-714.
- 727 43. Degnen ST, Newton A. 1972. Chromosome replication during development in *Caulobacter*  
728 *crescentus*. *Journal of molecular biology* 64:671-680.

- 729 44. Berne C, Ellison CK, Agarwal R, Severin GB, Fiebig A, Morton III RI, Waters CM, Brun YV. 2018.  
730 Feedback regulation of *Caulobacter crescentus* holdfast synthesis by flagellum assembly via the  
731 holdfast inhibitor HfiA. *Molecular microbiology*.  
732 45. Berne C, Kysela DT, Brun YV. 2010. A bacterial extracellular DNA inhibits settling of motile  
733 progeny cells within a biofilm. *Molecular microbiology* 77:815-829.  
734 46. Edgar RC. 2004. MUSCLE: multiple sequence alignment with high accuracy and high throughput.  
735 *Nucleic acids research* 32:1792-1797.  
736 47. Otto K, Elwing H, Hermansson M. 1999. Effect of ionic strength on initial interactions of  
737 *Escherichia coli* with surfaces, studied on-line by a novel quartz crystal microbalance technique.  
738 *Journal of bacteriology* 181:5210-5218.  
739 48. Zita A, Hermansson M. 1994. Effects of ionic strength on bacterial adhesion and stability of flocs  
740 in a wastewater activated sludge system. *Applied and Environmental Microbiology* 60:3041-3048.  
741 49. Dang H, Lovell CR. 2016. Microbial surface colonization and biofilm development in marine  
742 environments. *Microbiology and Molecular Biology Reviews* 80:91-138.  
743 50. Mohari B, Thompson MA, Trinidad J, Fuqua C. 2018. Multiple Flagellin Proteins Have Distinct  
744 and Synergistic Roles in *Agrobacterium tumefaciens* Motility. *bioRxiv:335265*.  
745 51. Li G, Brun YV, Tang JX. 2013. Holdfast spreading and thickening during *Caulobacter crescentus*  
746 attachment to surfaces. *BMC microbiology* 13:139.  
747 52. Arber W. 2000. Genetic variation: molecular mechanisms and impact on microbial evolution.  
748 *FEMS microbiology reviews* 24:1-7.  
749 53. Kim Y, Ho SO, Gassman NR, Korlann Y, Landorf EV, Collart FR, Weiss S. 2008. Efficient site-  
750 specific labeling of proteins via cysteines. *Bioconjugate chemistry* 19:786-791.  
751 54. Karatan E, Watnick P. 2009. Signals, regulatory networks, and materials that build and break  
752 bacterial biofilms. *Microbiology and Molecular Biology Reviews* 73:310-347.  
753 55. Bhosle N, Suci P, Baty A, Weiner R, Geesey G. 1998. Influence of divalent cations and pH on  
754 adsorption of a bacterial polysaccharide adhesin. *Journal of colloid and interface science* 205:89-  
755 96.  
756 56. Stigter D, Alonso D, Dill KA. 1991. Protein stability: electrostatics and compact denatured states.  
757 *Proceedings of the National Academy of Sciences* 88:4176-4180.  
758 57. Yang A-S, Honig B. 1994. Structural origins of pH and ionic strength effects on protein stability:  
759 acid denaturation of sperm whale apomyoglobin. *Journal of molecular biology* 237:602-614.  
760 58. Tamura K, Stecher G, Peterson D, Filipski A, Kumar S. 2013. MEGA6: molecular evolutionary  
761 genetics analysis version 6.0. *Molecular biology and evolution* 30:2725-2729.  
762 59. Ried JL, Collmer A. 1987. An nptI-sacB-sacR cartridge for constructing directed, unmarked  
763 mutations in gram-negative bacteria by marker exchange- eviction mutagenesis. *Gene* 57:239-  
764 246.  
765 60. Ely B. 1991. [17] Genetics of *Caulobacter crescentus*, p 372-384, *Methods in enzymology*, vol  
766 204. Elsevier.  
767 61. Gibson DG, Young L, Chuang R-Y, Venter JC, Hutchison III CA, Smith HO. 2009. Enzymatic  
768 assembly of DNA molecules up to several hundred kilobases. *Nature methods* 6:343.  
769 62. Ely B. 1991. Genetics of *Caulobacter crescentus*. *Methods Enzymol* 204:372-84.  
770 63. Link AJ, Phillips D, Church GM. 1997. Methods for generating precise deletions and insertions in  
771 the genome of wild-type *Escherichia coli*: application to open reading frame characterization. *J*  
772 *Bacteriol* 179:6228-37.  
773 64. Schneider CA, Rasband WS, Eliceiri KW. 2012. NIH Image to ImageJ: 25 years of image  
774 analysis. *Nature methods* 9:671.  
775 65. Ducret A, Quardokus EM, Brun YV. 2016. MicrobeJ, a tool for high throughput bacterial cell  
776 detection and quantitative analysis. *Nature microbiology* 1:16077.  
777 66. Miller JH. 1972. Assay of  $\beta$ -galactosidase. *Experiments in molecular genetics*.  
778

779

780 **ACKNOWLEDGEMENTS**

781 We thank Bogdan Dragnea, Department of Chemistry, Indiana University, for use of his AFM  
782 and facilities for analysis of the shed holdfasts. We thank the members of the Brun laboratory  
783 for the comments on the manuscript. This work was supported by National Institute of Health  
784 Grant R01GM102841 and R35GM122556 to Y.V.B. and a fellowship from the Department of  
785 Biology, Indiana University to NKC. Y.V.B holds a Canada 150 Research Chair in Bacterial Cell  
786 Biology.

787 **Table 1: Genes involved in holdfast synthesis, modification and anchoring**

| Gene name                                 | <i>C. crescentus</i><br>CB15 | <i>C. crescentus</i><br>NA1000 | <i>H. baltica</i> strain<br>IFAM 1418 <sup>T</sup> |
|-------------------------------------------|------------------------------|--------------------------------|----------------------------------------------------|
| <b>Export apparatus</b>                   |                              |                                |                                                    |
| <i>hfsA</i>                               | CC2431                       | CCNA_02513                     | Hbal_1968                                          |
| <i>hfsB</i>                               | CC2430                       | CCNA_02512                     | Hbal_1967                                          |
| <i>hfsD</i>                               | CC2432                       | CCNA_02514                     | Hbal_1969                                          |
| <b>Synthesis genes</b>                    |                              |                                |                                                    |
| <i>hfsC</i>                               | CC2429                       | CCNA_02511                     | Hbal_1972                                          |
| <i>hfsE</i>                               | CC2425                       | CCNA_02507                     | Hbal_1963                                          |
| <i>hfsJ</i>                               | CC0095                       | CCNA_00094                     | Hbal_1784                                          |
| <i>hfsG</i>                               | CC2427                       | CCNA_02509                     | Hbal_1964                                          |
| <i>hfsL</i>                               | CC2277                       | CCNA_02361                     | Hbal_1966                                          |
| <i>hfsI</i>                               | CC0500                       | CCNA_00533                     | Hbal_2115                                          |
| <i>hfsF</i>                               | CC2426                       | CCNA_02508                     | Hbal_0100                                          |
| <b>Modification genes (non essential)</b> |                              |                                |                                                    |
| <i>hfsH</i>                               | CC2428                       | CCNA_02510                     | Hbal_1965                                          |
| <i>hfsK</i>                               | CC3689                       | CCNA_03803                     | Hbal_0069                                          |
| <b>Anchor genes (non essential)</b>       |                              |                                |                                                    |
| <i>hfaA</i>                               | CC2628                       | CCNA_02711                     | Hbal_0652                                          |
| <i>hfaB</i>                               | CC2630                       | CCNA_02712                     | Hbal_0651                                          |
| <i>hfaD</i>                               | CC2629                       | CCNA_02713                     | Hbal_0650                                          |
| <i>hfaE</i>                               | CC2639                       | CCNA_02722                     | Hbal_0649                                          |

788

789

790 **Table 2: Lectin binding assays**

| Lectin                                | Specificity                            | <i>H. baltica</i><br>holdfast | <i>C. crescentus</i><br>holdfast |
|---------------------------------------|----------------------------------------|-------------------------------|----------------------------------|
| Wheat Germ Agglutinin                 | GlcNAc                                 | √                             | √                                |
| Lycopersicon Esculentum Tomato Lectin | GlcNAc 1-4                             | √                             | √*                               |
| Datura Stramonium Lectin              | GlcNAc 1-4                             | √*                            | -                                |
| Solanum Tuberosum Potato Lectin       | GlcNAc , prefers trimers and tetramers | √                             | √*                               |
| Ricinus Communis Agglutinin           | Galactose                              | √                             | -                                |
| Griffonia Simplicifolia Lectin 1      | α-GalNAc, α-galactose                  | √                             | -                                |
| Soybean Agglutinin                    | α-GalNAc                               | -                             | -                                |

791

792 √ Fluorescent signal detected

793 - No fluorescent signal detected

794 \* Binding is enhanced on rosettes but weaker signals on single cells.

795



796 **Table S1: Strains and Plasmids used in this study**

| Strain or Plasmid             | Description and or genotype                                                                                                                                                                                                              | Reference or source    |
|-------------------------------|------------------------------------------------------------------------------------------------------------------------------------------------------------------------------------------------------------------------------------------|------------------------|
| <b><i>E. coli</i></b>         |                                                                                                                                                                                                                                          |                        |
| $\alpha$ select               | <i>deoR endA1 relA1 gyrA96 hsdR17(r<sub>K</sub><sup>-</sup>m<sub>K</sub><sup>+</sup>) supE44 thi-1 <math>\Delta</math>(<i>lacZYA-argFV169</i>) <math>\phi</math>80<math>\delta</math><i>lacZ</i><math>\Delta</math>M15 F<sup>-</sup></i> | Bioline                |
| YB8430                        | $\alpha$ select /pNPTS139 $\Delta$ <i>hfsA</i>                                                                                                                                                                                           | This study             |
| YB8431                        | $\alpha$ select /pNPTS139 $\Delta$ <i>hfsL</i>                                                                                                                                                                                           | This study             |
| YB8432                        | $\alpha$ select /pNPTS139 $\Delta$ <i>hfaB</i>                                                                                                                                                                                           | This study             |
| YB8439                        | $\alpha$ select /pNPTS139 $\Delta$ <i>hfaD</i>                                                                                                                                                                                           | This study             |
| YB8440                        | $\alpha$ select /pNPTS139 $\Delta$ <i>hfsD</i>                                                                                                                                                                                           | This study             |
| YB172                         | $\alpha$ select /pNPTS139 $\Delta$ <i>hfsG</i>                                                                                                                                                                                           | This study             |
| YB8441                        | $\alpha$ select/ pMR10: <i>hfsA</i>                                                                                                                                                                                                      | This study             |
| YB8442                        | $\alpha$ select/ pMR10: <i>Phfa-hfaB</i>                                                                                                                                                                                                 | This study             |
| YB8443                        | $\alpha$ select/ pMR10: <i>PhfsE-hfsL</i>                                                                                                                                                                                                | This study             |
| YB8429                        | $\alpha$ select/ pMR10: <i>Pcu-hfsL</i>                                                                                                                                                                                                  | This study             |
| YB8433                        | $\alpha$ select/pMR10: <i>PhfaA-hfaD</i>                                                                                                                                                                                                 | This study             |
| YB8436                        | $\alpha$ select/ pMR10: <i>hfsD</i>                                                                                                                                                                                                      | This study             |
| YB8437                        | $\alpha$ select/ pMR10: <i>Pcu-lacZ</i>                                                                                                                                                                                                  | This study             |
| YB173                         | $\alpha$ select/ pMR10: <i>Pcu-hfsG</i>                                                                                                                                                                                                  | This study             |
| <b><i>C. Crescentus</i></b>   |                                                                                                                                                                                                                                          |                        |
| YB135                         | Wild-type strain CB15                                                                                                                                                                                                                    | (8)                    |
| YB4251                        | CB15 $\Delta$ <i>hfaB</i>                                                                                                                                                                                                                | (24)                   |
| <b><i>H. baltica</i></b>      |                                                                                                                                                                                                                                          |                        |
| YB5842                        | IFAM 1418 <sup>T</sup> Wild-type strain                                                                                                                                                                                                  | (26)                   |
| YB8404                        | YB5842 $\Delta$ <i>hfsA</i>                                                                                                                                                                                                              | This study             |
| YB8405                        | YB5842 $\Delta$ <i>hfsL</i>                                                                                                                                                                                                              | This study             |
| YB8406                        | YB5842 $\Delta$ <i>hfaB</i>                                                                                                                                                                                                              | This study             |
| YB210                         | YB5842 $\Delta$ <i>hfaB</i> $\Delta$ <i>hfaD</i>                                                                                                                                                                                         | This study             |
| YB8409                        | YB5842 $\Delta$ <i>hfsA</i> /pMR10: <i>hfsA</i>                                                                                                                                                                                          | This study             |
| YB8410                        | YB5842 $\Delta$ <i>hfaB</i> /pMR10: <i>Phfa-hfaB</i>                                                                                                                                                                                     | This study             |
| YB8414                        | YB5842 $\Delta$ <i>hfsL</i> /pMR10: <i>PhfsE-hfsL</i>                                                                                                                                                                                    | This study             |
| YB8417                        | YB5842 $\Delta$ <i>hfsG</i> $\Delta$ <i>hfaB</i> /pMR10: <i>Pcu-hfsG</i>                                                                                                                                                                 | This study             |
| YB8418                        | YB5842 $\Delta$ <i>hfsL</i> $\Delta$ <i>hfaB</i> /pMR10: <i>Pcu-hfsL</i>                                                                                                                                                                 | This study             |
| YB8424                        | YB5842 $\Delta$ <i>hfsL</i> /pMR10: <i>Pcu-hfsL</i>                                                                                                                                                                                      | This study             |
| YB8425                        | YB5842 $\Delta$ <i>hfaD</i>                                                                                                                                                                                                              | This study             |
| YB8426                        | YB5842 $\Delta$ <i>hfaD</i> /pMR10: <i>PhfaA-hfaD</i>                                                                                                                                                                                    | This study             |
| YB8427                        | YB5842 $\Delta$ <i>hfsD</i>                                                                                                                                                                                                              | This study             |
| YB8434                        | YB5842 $\Delta$ <i>hfsD</i> /pMR10: <i>hfsD</i>                                                                                                                                                                                          | This study             |
| YB8438                        | YB5842 pMR10: <i>Pcu-lacZ</i>                                                                                                                                                                                                            | This study             |
| YB173                         | YB5842 $\Delta$ <i>hfsG</i>                                                                                                                                                                                                              | This study             |
| YB174                         | YB5842 pMR10: <i>Pcu-hfsG</i>                                                                                                                                                                                                            | This study             |
| <b>Plasmids</b>               |                                                                                                                                                                                                                                          |                        |
| pNPTS139                      | pLitmus 39 derivative, <i>oriT</i> , <i>sacB</i> , Kan <sup>r</sup>                                                                                                                                                                      | M.R.K Alley            |
| pNPTS139 $\Delta$ <i>hfsA</i> | pNPTS139 containing 500 bp fragments upstream and downstream of <i>hfsA</i>                                                                                                                                                              | This study             |
| pNPTS139 $\Delta$ <i>hfsL</i> | pNPTS139 containing 500 bp fragments upstream and downstream of <i>hfsL</i>                                                                                                                                                              | This study             |
| pNPTS139 $\Delta$ <i>hfaB</i> | pNPTS139 containing 500 bp fragments upstream and downstream of <i>hfaB</i>                                                                                                                                                              | This study             |
| pNPTS139 $\Delta$ <i>hfaD</i> | pNPTS139 containing 500 bp fragments upstream and downstream of <i>hfaD</i>                                                                                                                                                              | This study             |
| pNPTS139 $\Delta$ <i>hfsD</i> | pNPTS139 containing 500 bp fragments upstream and downstream of <i>hfsD</i>                                                                                                                                                              | This study             |
| pNPTS139 $\Delta$ <i>hfsG</i> | pNPTS139 containing 500 bp fragments upstream and downstream of <i>hfsG</i>                                                                                                                                                              | This study             |
| pMR10                         | Mini-RK2 cloning vector; RK2 replication and stabilization functions                                                                                                                                                                     | R. Roberts and C. Mohr |
| pMR10: <i>hfsA</i>            | pMR10 containing <i>hfsA</i> gene with its native promoter                                                                                                                                                                               | This study             |
| pMR10: <i>Phfa-hfaB</i>       | pMR10 containing native <i>hfaA</i> promoter and the <i>hfaB</i> gene                                                                                                                                                                    | This study             |
| pMR10: <i>PhfsE-hfsL</i>      | pMR10 containing native <i>hfsE</i> promoter and the <i>hfsL</i> gene                                                                                                                                                                    | This study             |
| pMR10: <i>Pcu-hfsL</i>        | pMR10 containing copper inducible promoter of <i>CopA</i> and the <i>hfsL</i> gene                                                                                                                                                       | This study             |
| pMR10: <i>PhfaA-hfaD</i>      | pMR10 containing native <i>hfaA</i> promoter and the <i>hfaD</i> gene                                                                                                                                                                    | This study             |
| pMR10: <i>hfsD</i>            | pMR10 containing <i>hfsD</i> gene with its native promoter                                                                                                                                                                               | This study             |
| pMR10: <i>Pcu-lacZ</i>        | pMR10 containing copper inducible promoter of <i>CopA</i> and the <i>lacZ</i> gene                                                                                                                                                       | This study             |
| pMR10: <i>Pcu-hfsG</i>        | pMR10 containing copper inducible promoter of <i>CopA</i> and the <i>hfsG</i> gene                                                                                                                                                       | This study             |

797 **Table S2: Primers used in this study**

| Primers       | Sequence (5'→3')                                         | Description                           |
|---------------|----------------------------------------------------------|---------------------------------------|
| HbhfsAUpF     | GCGAATTCTGGATCCACGATGAAATACGCCGGATTATTG                  | 5' region for deletion of <i>hfsA</i> |
| HbhfsAFR      | ATACTTAGTCATTCTGATTCTGCTTTATCTAAAC                       |                                       |
| HbhfsAUpR     | CAGAAAGCTTCCTGCAGGATTAATTTAGTATCCGCCACAC                 | 3' region for deletion of <i>hfsA</i> |
| HbhfsARR      | GAATCAGAATGACTAAGTATTTGTTATTTAATTAATAAAAAATATACTTTTC     |                                       |
| HbhfsGT_pUpF  | GCCAAGCTTCTCTGCAGGATCAGTATTGTTATTCCAACATTTTCG            | 5' region for deletion of <i>hfsL</i> |
| HbhfsGT_UpR   | GTGAGTTTGGGTTGAATGCGATCCAAATC                            |                                       |
| HbhfsGT_DwF   | CGCATTCAACCCAAACTCACAAACTGAG                             | 3' region for deletion of <i>hfsL</i> |
| HbhfsGT_pDwR  | GCGAATTCTGGATCCAGATTTGGTCCAGCTCATAACG                    |                                       |
| HbhfaBUpF     | CGCGTTCGGCCGTGCTAGCAGGATCATTGCTTATTCCCG                  | 5' region for deletion of <i>hfaB</i> |
| HbhfaBFR      | TCGCCAATTATTGCGAATTGGGCTAGTC                             |                                       |
| HbhfaBUpR     | GCAGGATATCGTGGATCCAGGAAATATCGTTGACACTGG                  | 3' region for deletion of <i>hfaB</i> |
| HbhfaBRR      | CAATTCGCAATAATTGGCGATAAACTTCGC                           |                                       |
| phfaDupF      | GTGCTAGCGAATTCTGGATCCACGATGTCTTGCGAAACAGAATCTCTGGAAG     | 5' region for deletion of <i>hfaD</i> |
| hfaDupR       | CTAAGTTTCTATATGTATATTGAGAACTTGGTGTCTGAGACCTTTTAGATAGGC   |                                       |
| hfaDdwF       | GCCTATCTAAAAGGTCTCAGACACCAAGTTCTCAATATACATATAGAACTTAG    | 3' region for deletion of <i>hfaD</i> |
| phfaDdwR      | GGCGCCAGAAAGCTTCCTGCAGGATATAGTATGCAATGTTTCGATGGTGG       |                                       |
| hfsDupF       | GTGCTAGCGAATTCTGGATCCACGATTTCTGCTATCTTTGGGCAATTTTAG      | 5' region for deletion of <i>hfsD</i> |
| hfsDupR       | CTAGTGTAGTTAGTTAGCAATCTGAGGGTGTCTTTCTTAATGCATCCGTTTTG    |                                       |
| hfsDdwF       | CCAAAACGGATGCATTAAGAAAGCACCTCAGATTGCTGAACTAAACACTAG      | 3' region for deletion of <i>hfsD</i> |
| hfsDdwR       | GGCGCCAGAAAGCTTCCTGCAGGATACAGTAAAGAAAATTCATGTACAAC       |                                       |
| hfsA_upF      | ACGCCAAGCTTCCATGGGATGAAATACGCCGGATTATTG                  | Complementation of <i>hfsA</i>        |
| hfsA_DwpR     | GCTCTGCAGGAGATCTCGATTAATTTAGTATCCGCCACAC                 |                                       |
| hfaB_upF      | ACGCCAAGCTTCCATGGGATAATTGCGCCATTGTG                      | Complementation of <i>hfaB</i>        |
| hfaB_DwpR     | GCTCTGCAGGAGATCTCGATGAAATATCGTTGACACTGGC                 |                                       |
| PhfsE_hfsLupF | CCATGATTACGCAAGCTTCCATGGGATGGCCATACAAATATAAGCGGTGCTC     | Complementation of <i>hfsL</i>        |
| PhfsE_hfsLupR | CAATACTGACTTTTACGATTGGTTTCATTACGAAGAACACAGAGTGTCTCC      | using <i>hfsE</i> promoter            |
| PhfsE_hfsLdwF | GGAGACACTCTGTGTCTTCGTGAATGAACCAATCCGTAAGTCAAGTATTG       |                                       |
| PhfsE_hfsLdwR | CTAGAGCTCTGCAGGAGATCTCGATTAAAGTTGCGCTTTTGATAACTTTTTTG    |                                       |
| Pcu_hfsLupF   | CTAGAGCTCTGCAGGAGATCTCGATTATACACGGATCGCACGCC             | Complementation of <i>hfsL</i>        |
| Pcu_hfsLupR   | GGGTGTGTAATGCCAATCAATCATGATGTTCTCTCTTTCGCTTGGAC          | using copper promoter                 |
| Pcu_hfsLdwF   | GTCCAACGCAAGAAGGAGAACATCATGATTGATTGGCATTACACACCC         |                                       |
| Pcu_hfsLdwR   | CCATGATTACGCCAAGCTTCCATGGGATTTAAGTTGCGCTTTTGATAACTTTTTTG |                                       |
| phfaABDF      | CCATGATTACGCCAAGCTTCCATGGGATCGAGACGAAAACATGAACAGTTTCAC   | Complementation of <i>hfaB</i>        |
| phfaABDF      | CTAGAGCTCTGCAGGAGATCTCGATCAGACAAACAGTTAGAAGAATTTAGAAATC  |                                       |
| comphfsDupF   | CCATGATTACGCCAAGCTTCCATGGGATTTTCTGCTATCTCTTGGGCAATTTTAG  | Complementation of <i>hfsD</i>        |
| comphfsDdwR   | CTAGAGCTCTGCAGGAGATCTCGATTAGAAGGCGTTGTCTTTTAGGTTG        |                                       |
| CulacZupF     | CTAGAGCTCTGCAGGAGATCTCGATTATACACGGATCGCACGCC             | Expression of <i>lacZ</i> under       |
| CulacZupR     | CCCAGTCACGACGTTGTAACGACCATGATGTTCTCTCTTCTTGGCTTGGACG     | copper inducible promoter             |
| CulacZdwF     | CGTCCAACGCAAGAAGGAGAACATCATGGTCGTTTTACAACGTCGTGACTGGG    |                                       |
| CulacZdwR     | GATTACGCCAAGCTTCCATGGGATCGGTGGCGGCCGCTCTAGAAC            |                                       |
| hfsGupF       | GTGCTAGCGAATTCTGGATCCACGATGGTTTTAACAATCAGATTATTCTGTGC    | 5' region for deletion of <i>hfsG</i> |
| hfsGupR       | CGTTTTAATTTGGCGGGAAGGGTACATTGGATGCCTAGCGCTGTGTTTTTG      |                                       |
| hfsGdwF       | CAAAAACACAGCGCTAGGCATCAATGTACCCTTCCGCCAAATTAACG          | 3' region for deletion of <i>hfsG</i> |
| hfsGdwR       | GGCGCCAGAAAGCTTCCCTGCAGGATCAACATTAATCCGGGAAGAATACC       |                                       |
| Pcu_hfsGupF   | GATTACGCCAAGCTTCCATGGGATATCAATCATGAAGAGCCTCCGCATATATG    | Complementation of <i>hfsG</i>        |
| Pcu_hfsGupR   | CGTCCAACGCAAGAAGGAGAACATCATGAACACAACGCCCAACTTAGCG        | using copper promoter                 |
| Pcu_hfsGdwF   | CGCTAAGTTGGGGCGTTGTGTTTCATGATGTTCTCTCTTCTTGGCTTGGACG     |                                       |
| Pcu_hfsGdwR   | CTAGAGCTCTGCAGGAGATCTCGATTATACACGGATCGCACGCCTGACAATG     |                                       |

798

799 **Table S3: Lectin binding assays for all the lectins used.**

| Lectin                             | Specificity                                                | <i>H. baltica holdfast</i> | <i>C. crescentus holdfast</i> |
|------------------------------------|------------------------------------------------------------|----------------------------|-------------------------------|
| Wheat Germ Agglutinin              | GlcNAc, sialic acid                                        | √                          | √                             |
| Succinylated Wheat Germ Agglutinin | GlcNAc                                                     | √                          | √                             |
| Lycopersicon Esculentum Tomato     | GlcNAc 1-4                                                 | √                          | √*                            |
| Datura Stramonium Lectin           | GlcNAc 1-4                                                 | √*                         | -                             |
| Solanum Tuberosum Potato Lectin    | GlcNAc, prefers trimers and tetramers                      | √                          | √*                            |
| Ricinus Communis Agglutinin        | Galactose                                                  | √                          | -                             |
| Griffonia Simplicifolia Lectin 1   | α-GalNAc, α-galactose                                      | √                          | -                             |
| Soybean Agglutinin                 | α-GalNAc                                                   | -                          | -                             |
| Concanavalin A                     | α-linked mannose                                           | -                          | -                             |
| Dolichos Biflorus Agglutinin       | α-linked acetylgalactosamine                               | -                          | -                             |
| Peanut Agglutinin                  | Galactosyl β-1,3 N-acetylgalactosamine                     | -                          | -                             |
| Soybean Agglutinin                 | α or β acetylgalactosamine                                 | -                          | -                             |
| Ulex Europaeus Agglutinin 1        | N- acetylgalactosamine, sialic acid or chitobiose          | -                          | -                             |
| Len Culinaris Agglutinin           | α-linked mannose                                           | -                          | -                             |
| Pisum Sativum Agglutinin           | α-linked mannose, fucose or N-acetylchitobiose             | -                          | -                             |
| Erythrina Cristagalli Lectin       | Galactose, prefers Galactosyl β-1,4 N- acetylgalactosamine | -                          | -                             |
| Jacalin                            | Galactosyl β-1,3 N-acetylgalactosamine                     | -                          | -                             |
| Griffinia Simplicifolia Lectin 2   | α or β acetylgalactosamine                                 | -                          | -                             |
| Vicia Villosa Lectin               | α or β terminal N-acetylgalactosamine                      | -                          | -                             |

800 √ Fluorescent signal detected

801 - No fluorescent signal detected

802 \* Binding is enhanced on rosettes but weaker signals on single cells.

803 **FIGURE LEGEND.**

804 **Figure 1: Organization of the holdfast gene cluster in *H. baltica***

805 **A.** Schematic of holdfast synthesis, modification, secretion, and anchor machineries. Holdfast  
806 polysaccharide synthesis is initiated by glycosyltransferase HfsE, which transfers activated  
807 sugar precursors in the cytoplasm to a lipid carrier. Three glycosyltransferases HfsJ, HfsG and  
808 HfsL add different sugars to the growing polysaccharide. The acetyltransferase HfsK and the  
809 deacetylase HfsH modify one or more sugar residue and then a flippase HfsF transports the  
810 lipid carrier into periplasm. Repeat units are polymerized by polymerases HfsC and HfsI. The  
811 polysaccharide is exported to the outside of the cell through the HfsA, HfsB, HfsD complex. The  
812 exported polysaccharide is then anchored to the cell body by secreted protein HfaA, HfaB and  
813 HfaD. The different colors of hexagons represent different sugars. **B.** Diagrams of *C. crescentus*  
814 and *H. baltica* dimorphic cell cycles. A motile swarmer cell differentiates into stalked cell by  
815 shedding its flagellum and synthesizing holdfast at the same cell pole. *C. crescentus* stalked cell  
816 divide asymmetrical to produce a motile swarmer and a stalked cell (top panel) and *H. baltica*  
817 reproduces by budding a motile swarmer off the stalk (bottom panel). **C.** Maximum likelihood  
818 phylogeny inferred from 16S rRNA sequences of selected freshwater and marine members of  
819 Caulobacterales. Node values represent clade frequency of 1000 bootstraps. The genes were  
820 identified using reciprocal best hit analysis on fully sequenced Caulobacterales genomes. Solid  
821 gene symbols indicate genes within the *hfs* or *hfa* loci while striped symbols indicate the genes  
822 translocated from these loci to a different location in the genome. Empty boxes indicate absent  
823 or missing genes. Blue represents synthesis genes, turquoise represents modification genes,  
824 red represents polysaccharide export genes and navy blue represents anchor genes.

825

826 **Figure 2: Role of the *hfs* and *hfa* genes in *H. baltica* holdfast production.**

827 **A.** Representative images showing merged phase and fluorescence channels of different *H.*  
828 *baltica* WT and mutant strains with holdfast labeled with WGA-AF488 (green): *H. baltica* holdfast

829 anchor mutants  $\Delta hfaB$  and  $\Delta hfaD$ , export mutants  $\Delta hfsA$  and  $\Delta hfsD$ , and synthesis mutants  $\Delta hfsG$   
830 and  $\Delta hfsL$ . **B.** Quantification of biofilm using crystal violet assay after 12 hours for *hfs* and *hfa* *H.*  
831 *baltica* mutants. Data are expressed as an average of 5 independent replicates and the error bars  
832 represent the standard error.

833

834 **Figure 3: Effect of modulating *hfsL* and *hfsG* expression in *H. baltica* holdfast properties.**

835 **A.** Representative images showing merged phase and fluorescence channels of *H. baltica* WT,  
836  $\Delta hfsL$  and  $\Delta hfsG$  mutants complemented with copper inducible promoter constructs and grown in  
837 marine broth with 0  $\mu$ M, 10  $\mu$ M and 250  $\mu$ M  $\text{CuSO}_4$ . Holdfast is labeled with WGA-AF488. **B.**  
838 Biofilm quantification after 12 h using crystal violet assay of  $\Delta hfsL$  and  $\Delta hfsG$  mutants and  
839 complementations under copper inducible promoter in marine broth supplemented with 0  $\mu$ M, 10  
840  $\mu$ M and 250  $\mu$ M  $\text{CuSO}_4$ . Data are expressed as an average of 6 independent replicates and the  
841 error bars represent the standard error. **C.** Images of WGA-AF488 labeled *H. baltica*  $\Delta hfaB$ , *H.*  
842 *baltica*  $\Delta hfaB$   $\Delta hfsL$  pMR10: $P_{\text{Cu}}$ *hfsL*, *H. baltica*  $\Delta hfaB$   $\Delta hfsG$  pMR10: $P_{\text{Cu}}$ *hfsG* shed holdfasts  
843 bound to glass slide. Cells were grown in marine broth with 0  $\mu$ M, 10  $\mu$ M and 250  $\mu$ M  $\text{CuSO}_4$   
844 induction for 4 hrs. **D.** Percentage of holdfasts bound to glass slide per field of view at different  
845  $\text{CuSO}_4$  induction measured in (C). Data are expressed as an average of 5 independent replicates  
846 and the error bars represent the standard error. **E.** Time-lapse montage of a *H. baltica*  $\Delta hfsL$   
847 pMR10: $P_{\text{Cu}}$ *hfsL* induced with 10  $\mu$ M (upper panels) and 250  $\mu$ M (lower panels)  $\text{CuSO}_4$  in a  
848 microfluidic device with initially no flow and then low flow introduced to the microfluidic device.  
849 Arrows represent time when no flow (first 120 seconds) and flow (later times) was applied to the  
850 device.

851

852 **Figure 4: *H. baltica* produces large holdfasts**

853 **A.** Images of *H. baltica*, *C. crescentus* and mixed culture with holdfasts labeled with WGA-  
854 AF488 (green). **B.** Quantification of holdfast size based on fluorescent area covered by WGA-  
855 AF488 collected in (A). Data on the box and whiskers plots represent 5 independent replicates  
856 of 200 holdfasts from each strain. **C** AFM images of dry shed holdfasts from *H. baltica*  $\Delta hfaB$   
857 and *C. crescentus*  $\Delta hfaB$  deposited on a mica surface. The colors on the scale represent the  
858 height of the holdfast relative to the surface. **D.** Box and whiskers plots of holdfast height  
859 distribution from the AFM images collected in (C). More than 500 holdfasts were measured in 10  
860 independent images.

861

862 **Figure 5: *H. baltica* produces holdfasts via developmental pathway and upon contact**  
863 **with a surface.**

864 **A.** Montages of *H. baltica* holdfast synthesis by a newly budded swarmer cell on a glass surface  
865 on a microfluidic device (holdfast production after surface contact, top panel), and on soft  
866 agarose pads (holdfast production after cell division, bottom panel). Holdfasts are labeled with  
867 WGA-AF488 (green). Images were acquired every 20 sec (top panel) and 2 min (bottom panel),  
868 and holdfast synthesis timing was processed using MicrobeJ. The arrow indicates the time it  
869 takes for holdfast to be detected after surface contact. **B.** Box and whisker plots representing  
870 the quantification of *H. baltica* holdfast timing via surface contact stimulation and developmental  
871 pathway. Data for *C. crescentus* holdfast synthesis timing were extracted from (2). Total number  
872 of cells analyzed is 100 for each set up. **C.** Time-lapse montage of a *H. baltica* swarmer cell  
873 differentiating into a budding stalked cell on agarose pad containing WGA-AF488 to  
874 label holdfast. Images were collected every 5 min for 3 h. The arrow indicates the time it  
875 takes for holdfast to be detected after cell division.

876

877 **Figure 6: *H. baltica* holdfast contains GlcNAc and galactose monosaccharides, and**  
878 **proteins.**

879 **(A-C)** Representative images showing merged phase and fluorescence channels on the left and  
880 fluorescence channels alone on the middle and right. **A.** *H. baltica* and *C. crescentus* holdfasts  
881 were co-labeled with WGA-AF594 (GlcNAc) and GSL1-AF488 (galactose) lectins, to stain  
882 polysaccharides. **B** *H. baltica* and *C. crescentus* holdfasts were co-labeled with WGA-AF594  
883 (GlcNAc) lectin and AF488mal, to stain peptides. **C.** *H. baltica* and *C. crescentus* holdfasts were  
884 co-labeled with WGA-AF594 (GlcNAc) lectin and YOYO-1-AF488, to stain DNA.

885

886 **Figure 7: *H. baltica* holdfast tolerates higher ionic strength.**

887 **A.** Images of WGA-AF488 labeled *H. baltica*  $\Delta hfaB$  and *C. crescentus*  $\Delta hfaB$  shed holdfasts  
888 bound to glass slide, incubated in different concentration of NaCl for 4 hours. **B.** Percentage of  
889 holdfasts bound per field of view at different concentrations of NaCl. Gray arrow indicates ionic  
890 strength of marine broth and Baltic sea (250 mM), natural habitat for *H. baltica*. Data are  
891 expressed as an average of 6 independent replicates and the error bars represent the standard  
892 error. **C.** Percentage of holdfasts bound per field of view at different concentrations of MgSO<sub>4</sub>.  
893 Data are expressed as an average of 4 independent replicates and the error bars represent the  
894 standard error **D.** Images of WGA-AF488 labeled holdfasts already bound to a glass surface  
895 and incubated in 0 mM NaCl (left) and 1 M NaCl (right) for 12hrs. **E.** Percentage of holdfasts  
896 bound per field of view at 0 M or 1 M NaCl. The first incubation was done by adding 0 M or 1 M  
897 of NaCl to a holdfast suspension spotted on a glass slide. After a 12 h incubation, the second  
898 incubation was done after washing off unbound holdfasts, by adding 0 M or 1 M NaCl directly to  
899 the holdfasts attached to the glass slide, and by incubating for another 12 h. Data are expressed  
900 as an average of 5 independent replicates and the error bars represent the standard error.

901

902 **Figure S1: Design of a copper inducible promoter system in *H. baltica*.**

903 **A.** Chromosomal arrangement of one of the copper sensitive operon (*Cso*) genes in *H. baltica*  
904 genome, showing copper operon repressor *csoR* and copper binding proteins *copA* and *copB*  
905 (top panel). The bottom diagram shows the fusion of copper-inducible promoter ( $P_{cu}$ ) to *lacZ*  
906 reporter gene. **B.** Effect of different concentration of  $CuSO_4$  added into marine broth on *H.*  
907 *baltica* growth. Growth yield ( $OD_{600}$ ) was measured on overnight cultures with different  
908 concentration of  $CuSO_4$ . Data represent mean of four independent replicates and the error bars  
909 represent standard error. **C.** Representative growth curves of *H. baltica* growing in marine broth  
910 without or with 500  $\mu M$   $CuSO_4$ .  $OD_{600}$  representing bacterial growth in a 24 well plate was  
911 measured every 30 min. **D.**  $\beta$ -galactosidase activity representing the  $P_{cu}$  activity when induced  
912 with different concentrations of  $CuSO_4$ . Exponential cultures were induced for 4 hrs. Data shown  
913 is representative of three independent replicates.

914

915 **Figure S2: DNA inhibition of holdfast binding and biofilm formation.**

916 **A.** *C. crescentus* (upper panel) and *H. baltica* (lower panel) cells bound to a glass surface in  
917 presence of eDNA from each strain. Holdfasts labeled with WGA-AF488 lectins after  
918 exponentially grown cells were bound to a glass slide for 45 min. **B.** Biofilm quantification after  
919 24 h for *C. crescentus* and *H. baltica* in presence of eDNA. Data are expressed as an average  
920 of 4 independent replicates and the error bars represent the standard error.



**Figure 1**

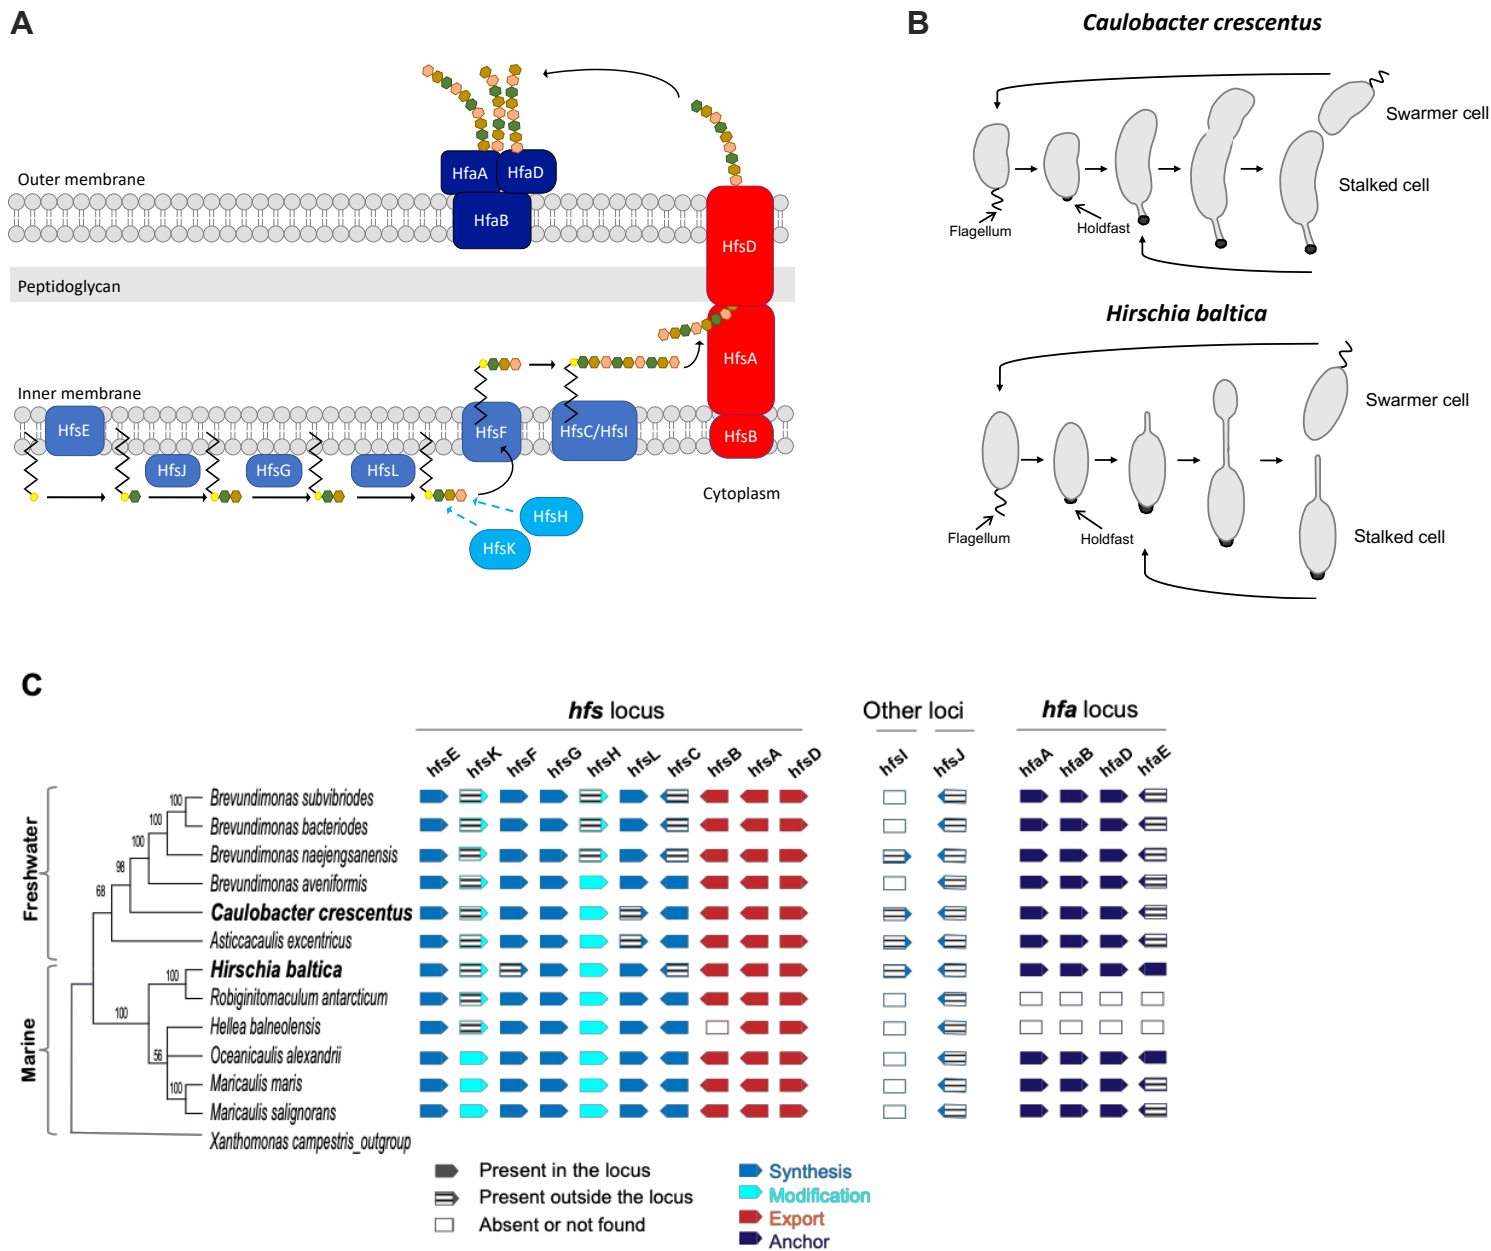

Figure 2

A

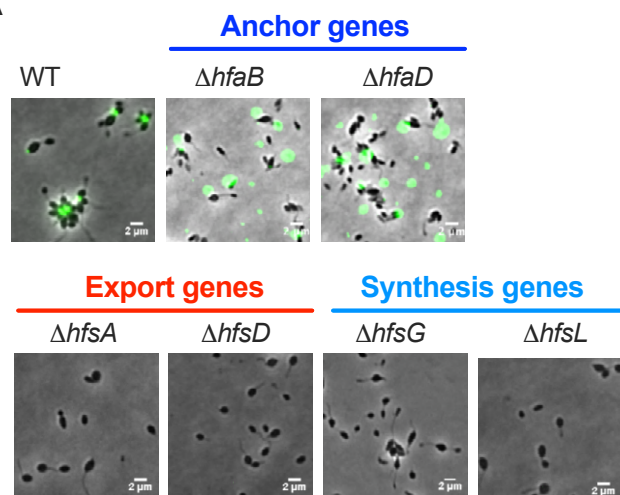

B

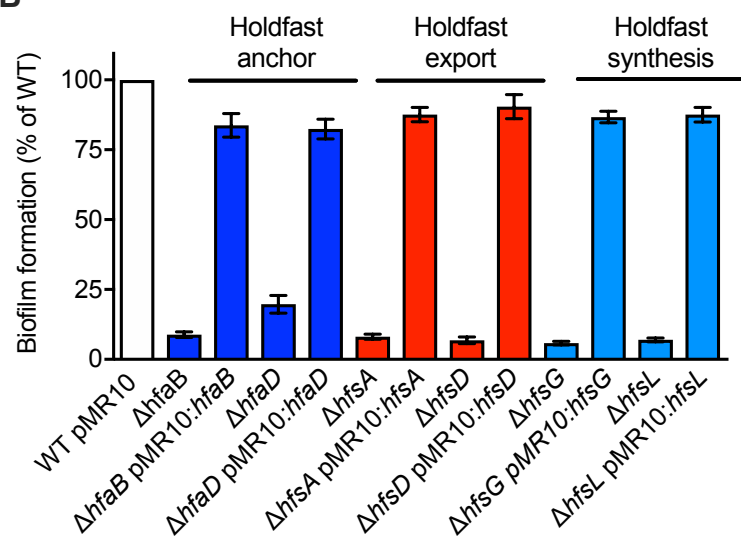

**Figure 3**

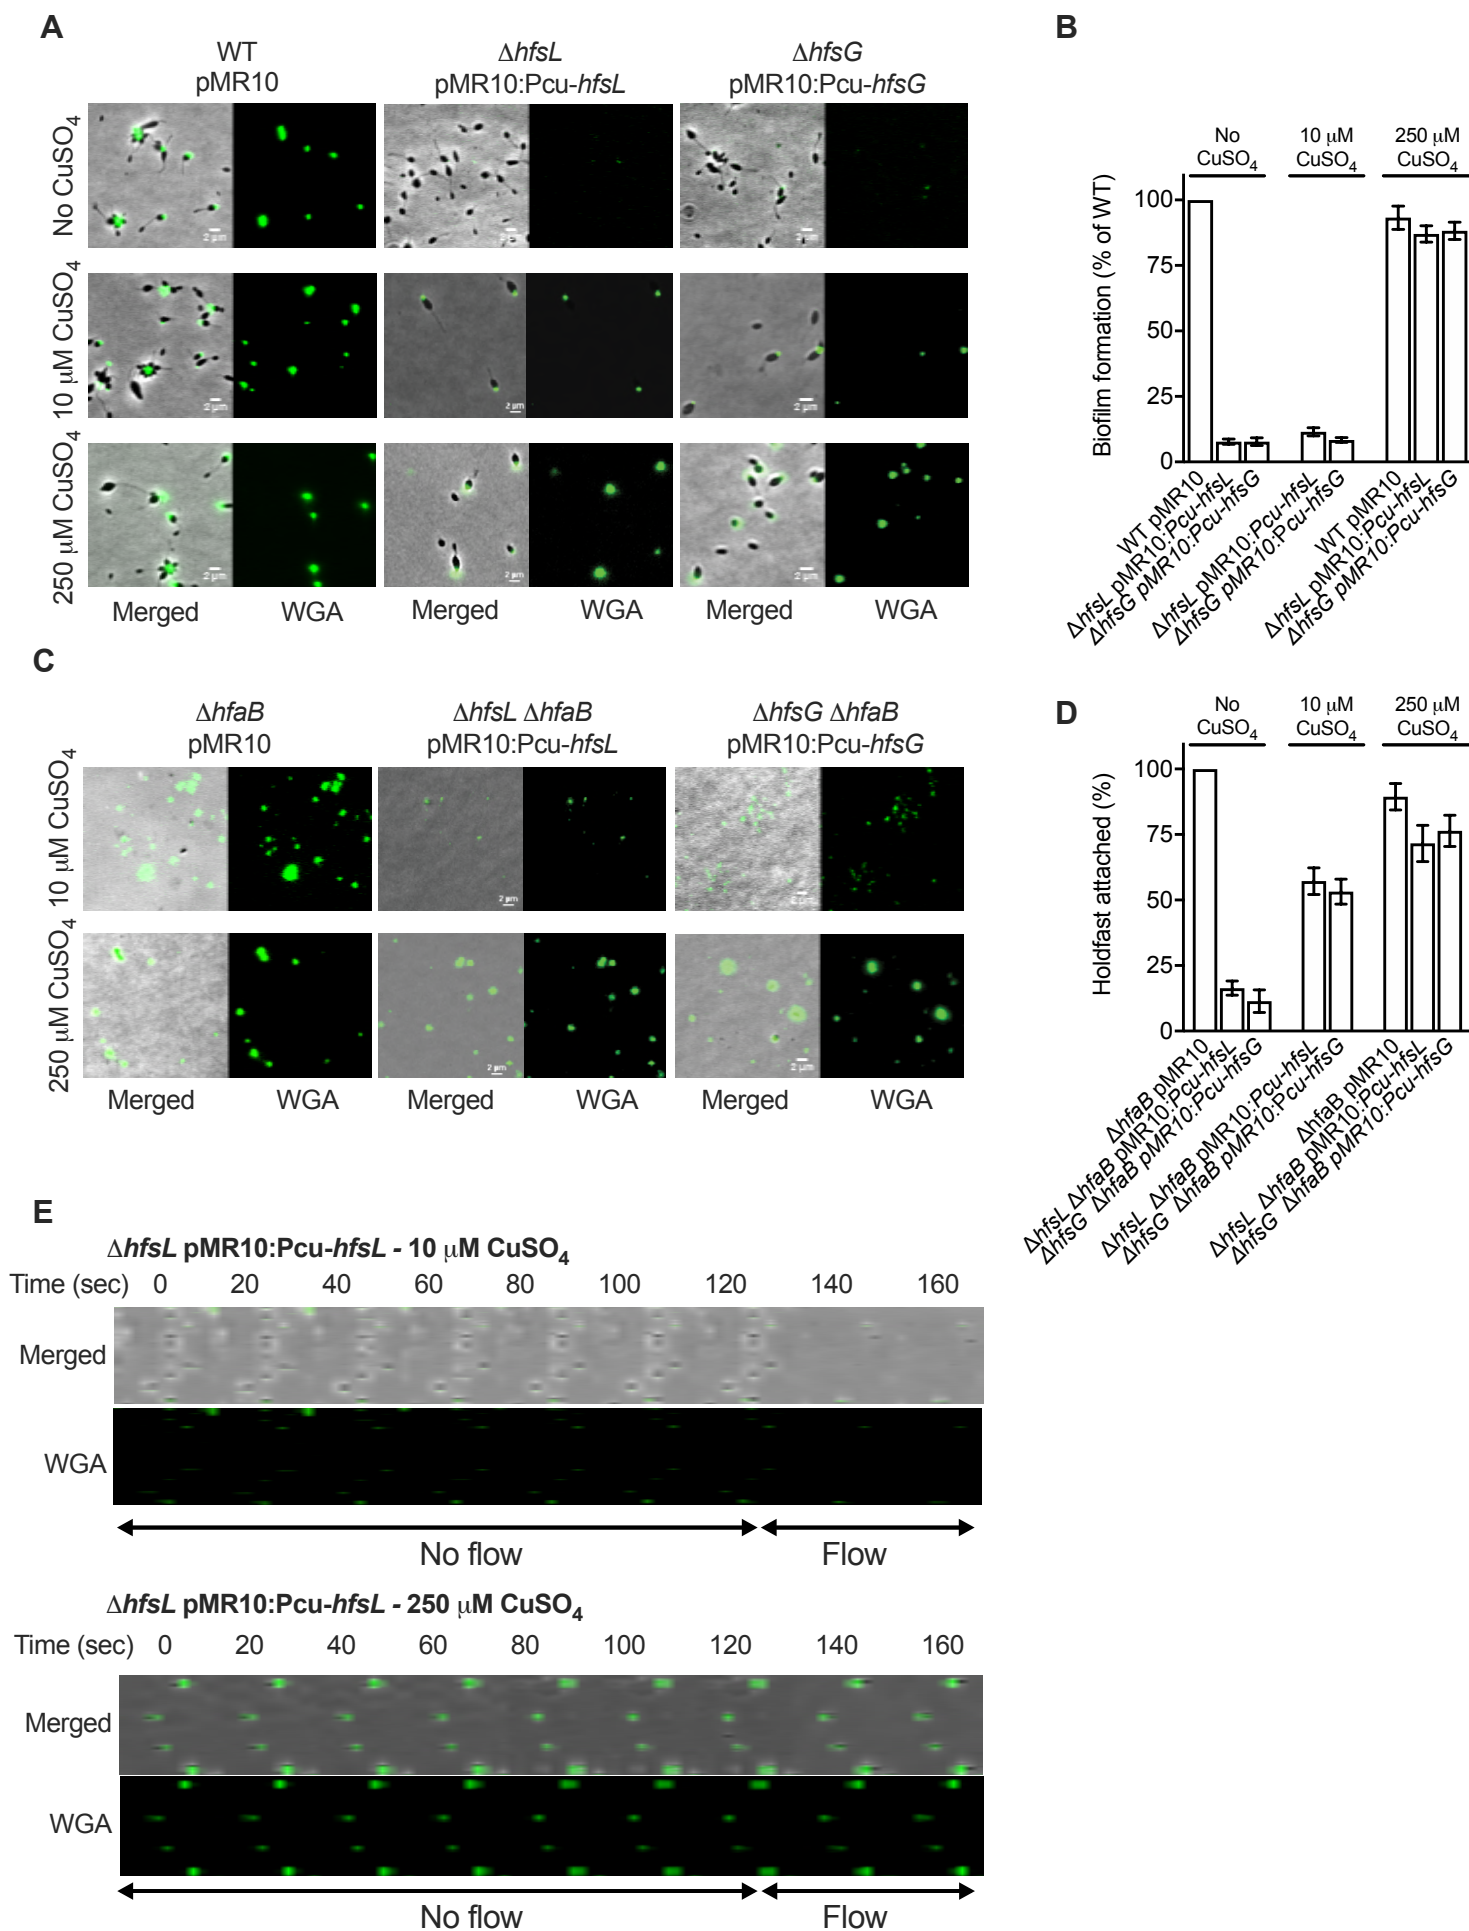

## Figure 4

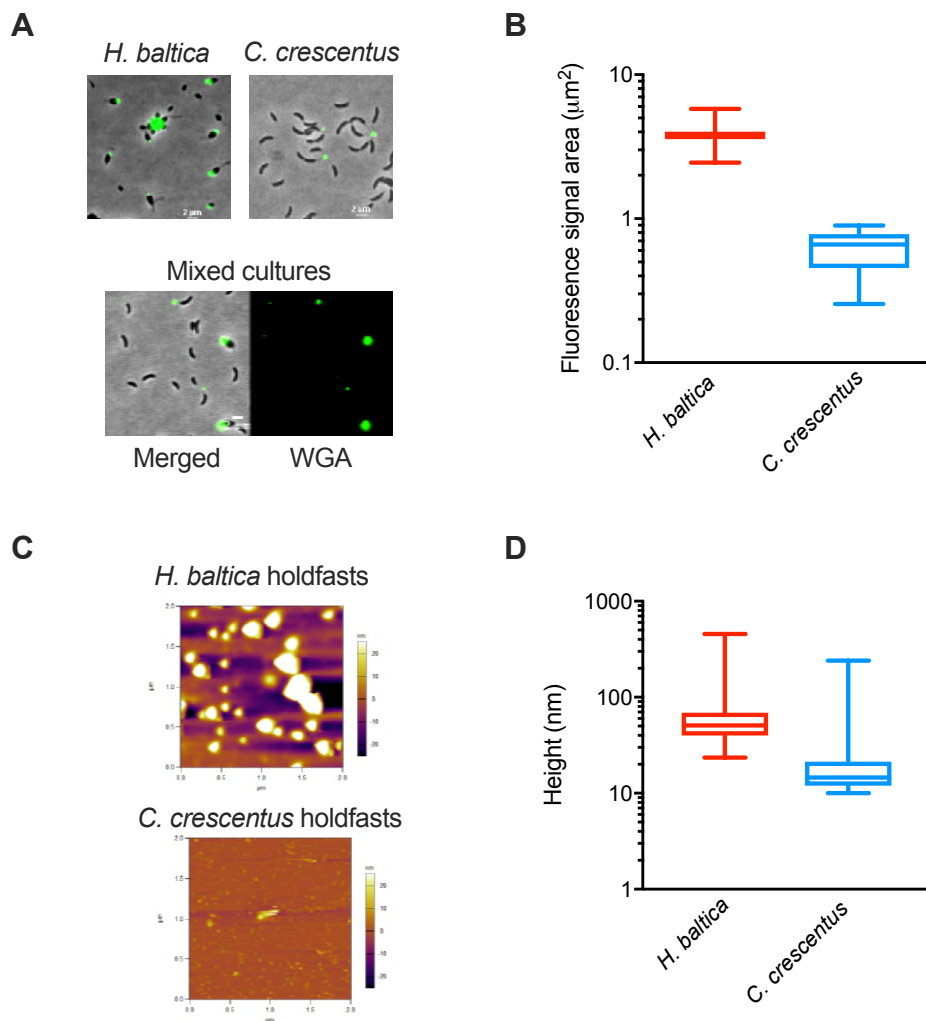

## Figure 5

A

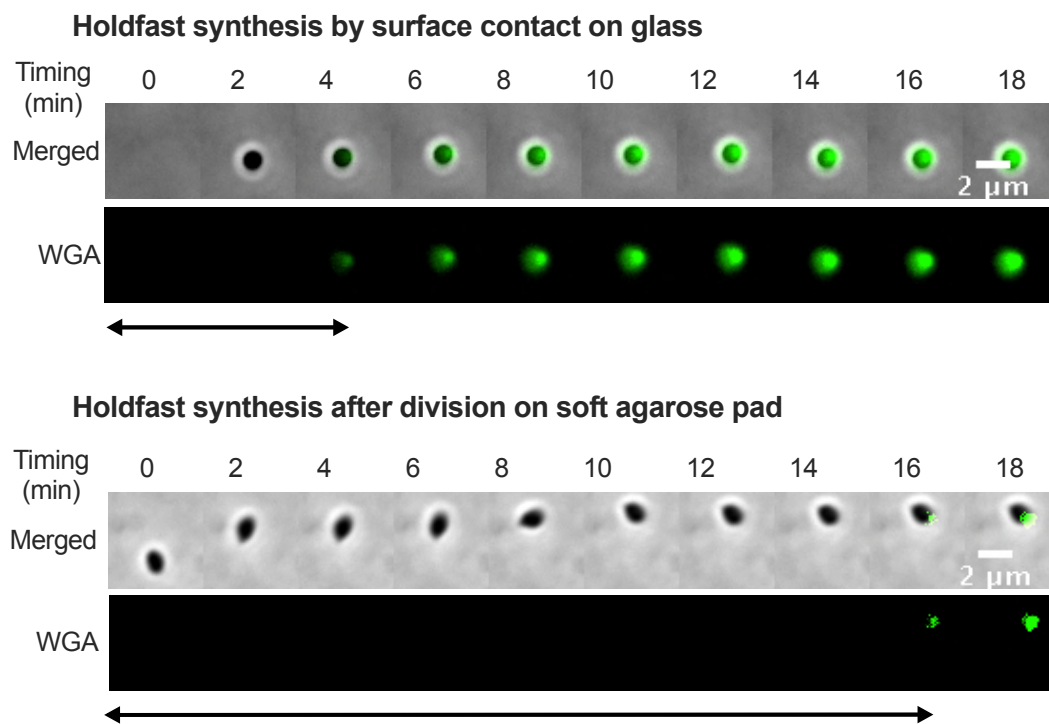

B

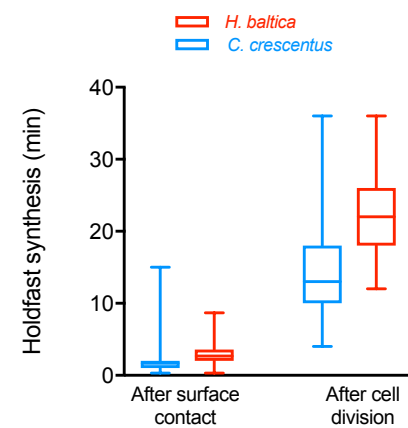

C

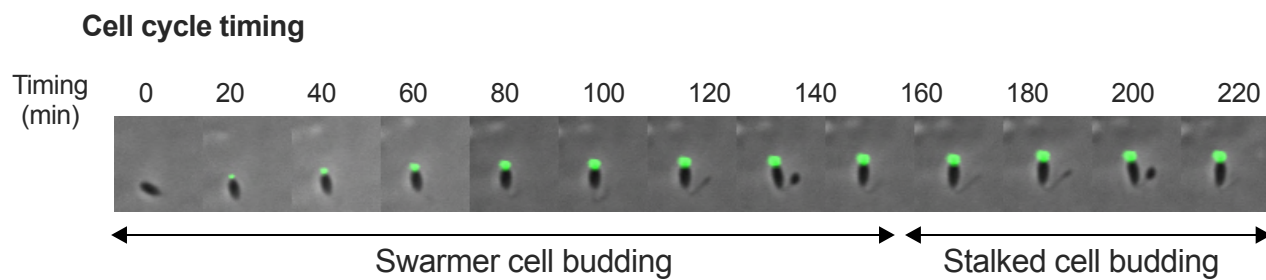

## Figure 6

### A Polysaccharide staining

*H. baltica*

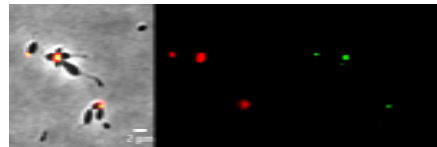

Merged WGA GSL1

*C. crescentus*

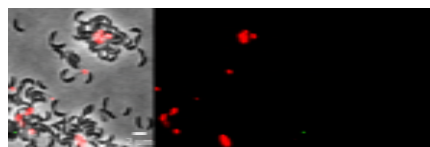

Merged WGA GSL1

### B Polysaccharide staining

*H. baltica*  $\Delta hfsA$

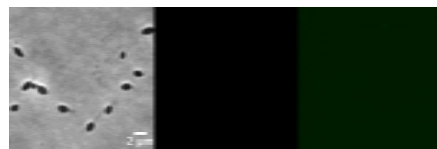

Merged WGA GSL1

*H. baltica*  $\Delta hfaB$

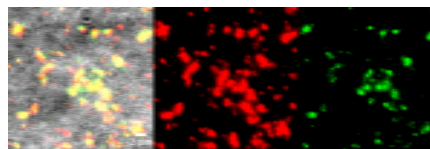

Merged WGA GSL1

### C Peptide staining

*H. baltica*

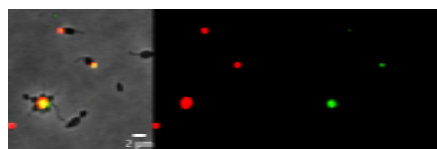

Merged WGA Maleimide

*C. crescentus*

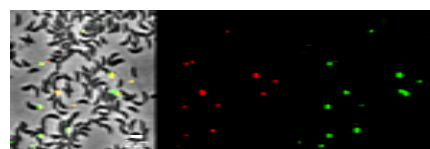

Merged WGA Maleimide

### D Peptide staining

*H. baltica*  $\Delta hfsA$

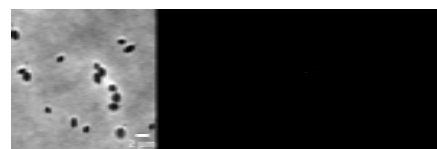

Merged WGA Maleimide

*H. baltica*  $\Delta hfaB \Delta hfaD$

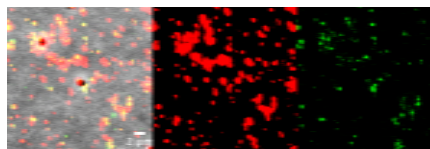

Merged WGA Maleimide

### E DNA staining

*H. baltica*

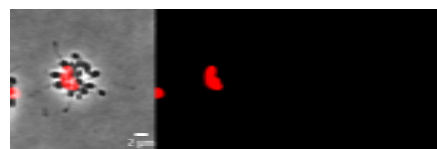

Merged WGA YOYO-1

*C. crescentus*

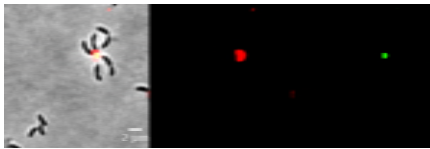

Merged WGA YOYO-1

**Figure 7**

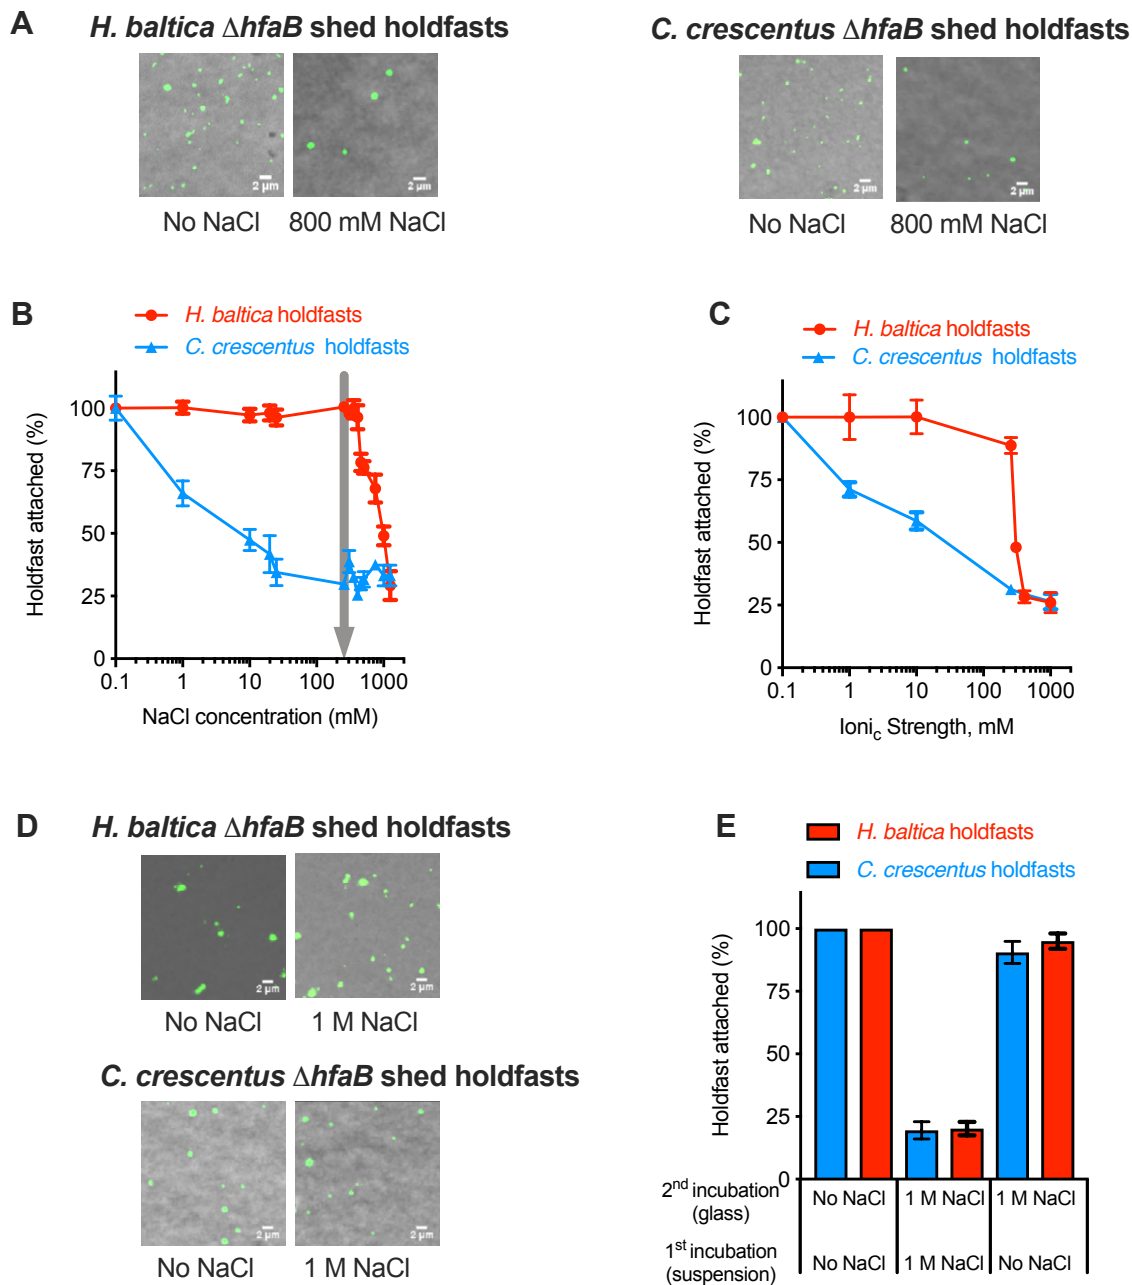

## Figure S1

A

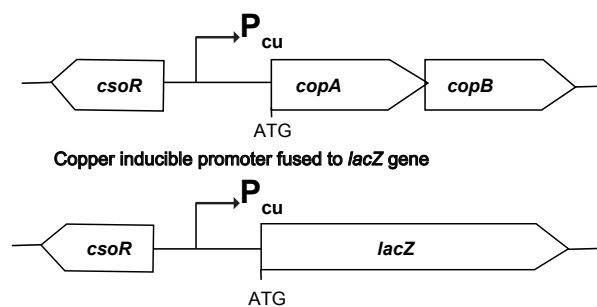

B

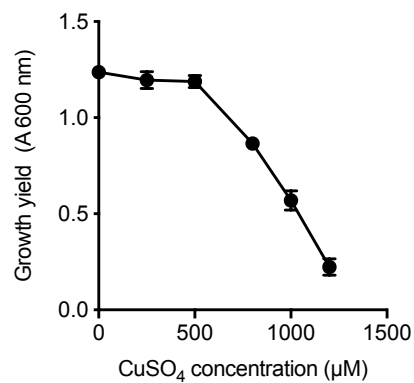

C

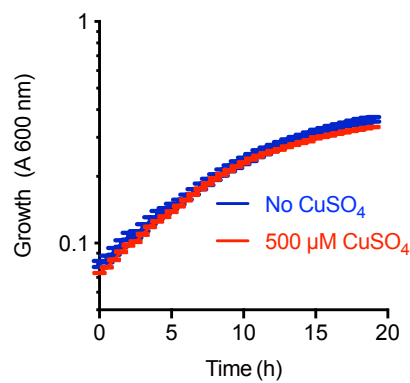

D

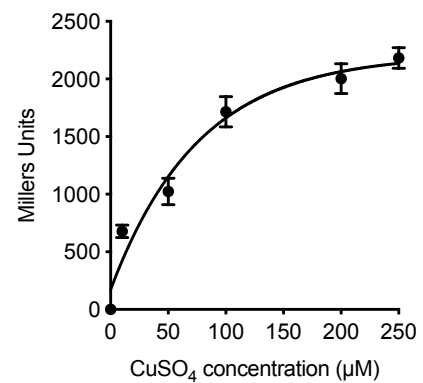



## Figure S2

### A *C. crescentus*

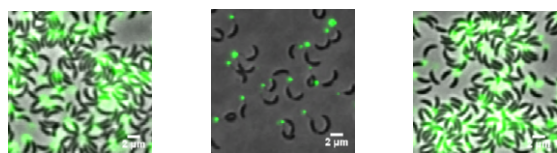

No eDNA

+ *C. crescentus*  
eDNA

+ *H. baltica*  
eDNA

### *H. baltica*

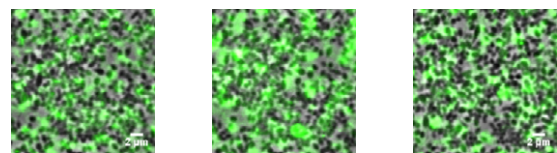

No eDNA

+ *C. crescentus*  
eDNA

+ *H. baltica*  
eDNA

### B

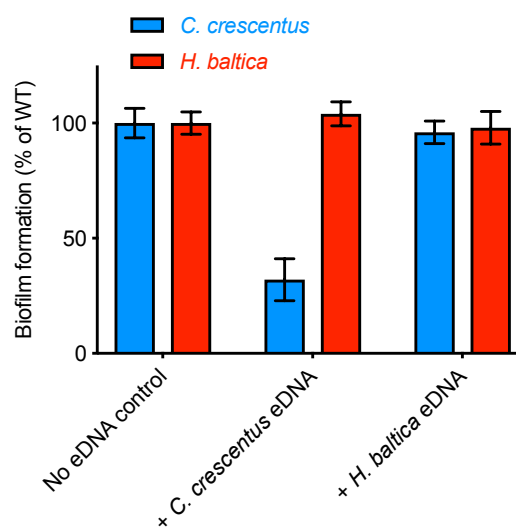

Source: https://www.biorxiv.org/content/10.1101/523142v1.full.pdf
